# Supplementary material for: No pre-zygotic isolation mechanisms between Schistosoma haematobium and Schistosoma bovis parasites: From mating interactions to differential gene expression
Source: PubMed Central journal article supplement (PMC8127863; doi:10.1371/journal.pntd.0009363), 2021-05-04

# PLOS Neglected Tropical Diseases

## Pre-zygotic isolation mechanisms between *Schistosoma haematobium* and *Schistosoma bovis* parasites: from mating interactions to differential gene expression --Manuscript Draft--

|                                                                                                                                                                                                                                                                                                                                                                                                                                                                                               |                                                                                                                                                                                                                                                                                                                                                                                                                                                                                                                                                                                                                                                                                                                                                                                                                                                                                                                                                                                                                                                                                                                                                                                                                                                                                                                                                                                                                                                                                                                                                                                                                                                                                                                                                                                                         |
|-----------------------------------------------------------------------------------------------------------------------------------------------------------------------------------------------------------------------------------------------------------------------------------------------------------------------------------------------------------------------------------------------------------------------------------------------------------------------------------------------|---------------------------------------------------------------------------------------------------------------------------------------------------------------------------------------------------------------------------------------------------------------------------------------------------------------------------------------------------------------------------------------------------------------------------------------------------------------------------------------------------------------------------------------------------------------------------------------------------------------------------------------------------------------------------------------------------------------------------------------------------------------------------------------------------------------------------------------------------------------------------------------------------------------------------------------------------------------------------------------------------------------------------------------------------------------------------------------------------------------------------------------------------------------------------------------------------------------------------------------------------------------------------------------------------------------------------------------------------------------------------------------------------------------------------------------------------------------------------------------------------------------------------------------------------------------------------------------------------------------------------------------------------------------------------------------------------------------------------------------------------------------------------------------------------------|
| <b>Manuscript Number:</b>                                                                                                                                                                                                                                                                                                                                                                                                                                                                     | PNTD-D-20-01594                                                                                                                                                                                                                                                                                                                                                                                                                                                                                                                                                                                                                                                                                                                                                                                                                                                                                                                                                                                                                                                                                                                                                                                                                                                                                                                                                                                                                                                                                                                                                                                                                                                                                                                                                                                         |
| <b>Full Title:</b>                                                                                                                                                                                                                                                                                                                                                                                                                                                                            | Pre-zygotic isolation mechanisms between <i>Schistosoma haematobium</i> and <i>Schistosoma bovis</i> parasites: from mating interactions to differential gene expression                                                                                                                                                                                                                                                                                                                                                                                                                                                                                                                                                                                                                                                                                                                                                                                                                                                                                                                                                                                                                                                                                                                                                                                                                                                                                                                                                                                                                                                                                                                                                                                                                                |
| <b>Short Title:</b>                                                                                                                                                                                                                                                                                                                                                                                                                                                                           | Pre-zygotic barriers between schistosome species                                                                                                                                                                                                                                                                                                                                                                                                                                                                                                                                                                                                                                                                                                                                                                                                                                                                                                                                                                                                                                                                                                                                                                                                                                                                                                                                                                                                                                                                                                                                                                                                                                                                                                                                                        |
| <b>Article Type:</b>                                                                                                                                                                                                                                                                                                                                                                                                                                                                          | Research Article                                                                                                                                                                                                                                                                                                                                                                                                                                                                                                                                                                                                                                                                                                                                                                                                                                                                                                                                                                                                                                                                                                                                                                                                                                                                                                                                                                                                                                                                                                                                                                                                                                                                                                                                                                                        |
| <b>Keywords:</b>                                                                                                                                                                                                                                                                                                                                                                                                                                                                              | Schistosoma; Hybridization; Reproductive isolation mechanisms; RNA-sequencing                                                                                                                                                                                                                                                                                                                                                                                                                                                                                                                                                                                                                                                                                                                                                                                                                                                                                                                                                                                                                                                                                                                                                                                                                                                                                                                                                                                                                                                                                                                                                                                                                                                                                                                           |
| <b>Abstract:</b>                                                                                                                                                                                                                                                                                                                                                                                                                                                                              | <p>Species usually develop reproductive isolation mechanisms allowing them to avoid interbreeding. These preventive barriers can act before reproduction “pre-zygotic barriers”, limiting unfavourable mating, or during the life cycle, “post-zygotic barriers”, determining the viability and selective success of the hybrid offspring. Hybridization in parasites and the underlying reproductive isolation mechanisms allowing them to maintain their genetic integrity have poorly been explored and are still misunderstood. Using an integrated approach this work aims to quantify the relative importance of pre-zygotic barriers in <i>Schistosoma haematobium</i> x <i>Schistosoma bovis</i> crosses. These two co-endemic species cause schistosomiasis, one of the major debilitating parasitic diseases worldwide and can hybridize naturally. Using mate choice experiments we first tested if a specific mate recognition system exists between both species. Second, using RNA-sequencing we analysed differential gene expression between homo- and hetero-specific pairing in male and female adult parasites. We show that homo- and hetero-specific pairing occurs randomly between these two species, and few genes in both sexes are affected by hetero-specific pairing. This suggests that i) the choice of mate is not a reproductive isolating factor, and that ii) no pre-zygotic barrier except spatial isolation “by the host” seems to limit interbreeding between these two species. Interestingly, some of the genes affected by the pairing status of the worms can be related to pathways affected during male and female interactions and may also present interesting candidates for species isolating mechanisms and hybridization in schistosome parasites.</p> |
| <b>Additional Information:</b>                                                                                                                                                                                                                                                                                                                                                                                                                                                                |                                                                                                                                                                                                                                                                                                                                                                                                                                                                                                                                                                                                                                                                                                                                                                                                                                                                                                                                                                                                                                                                                                                                                                                                                                                                                                                                                                                                                                                                                                                                                                                                                                                                                                                                                                                                         |
| <b>Question</b>                                                                                                                                                                                                                                                                                                                                                                                                                                                                               | <b>Response</b>                                                                                                                                                                                                                                                                                                                                                                                                                                                                                                                                                                                                                                                                                                                                                                                                                                                                                                                                                                                                                                                                                                                                                                                                                                                                                                                                                                                                                                                                                                                                                                                                                                                                                                                                                                                         |
| <b>Financial Disclosure</b><br><br>Enter a financial disclosure statement that describes the sources of funding for the work included in this submission. Review the <a href="#">submission guidelines</a> for detailed requirements. View published research articles from <a href="#">PLOS NTDs</a> for specific examples.<br><br>This statement is required for submission and <b>will appear in the published article</b> if the submission is accepted. Please make sure it is accurate. | <b>Funding</b><br><br>This work has been funded by the French Research National Agency (project HySWARM, grant no. ANR-18-CE35-0001). SM was supported by the Occitania region (project MOLRISK, award no. NREST 2019/1/059), the European “Fonds Européen de Développement Régional” (FEDER) and MRG by the Fellowship of “Estancias breves” (linked to the Programa de Ayudas de Formacion de Profesorado Universitario 2015, Ministerio de Ciencia, Innovación y Universidades, Spain).                                                                                                                                                                                                                                                                                                                                                                                                                                                                                                                                                                                                                                                                                                                                                                                                                                                                                                                                                                                                                                                                                                                                                                                                                                                                                                              |

### Unfunded studies

Enter: *The author(s) received no specific funding for this work.*

### Funded studies

Enter a statement with the following details:

- Initials of the authors who received each award
- Grant numbers awarded to each author
- The full name of each funder
- URL of each funder website
- Did the sponsors or funders play any role in the study design, data collection and analysis, decision to publish, or preparation of the manuscript?
- **NO** - Include this sentence at the end of your statement: *The funders had no role in study design, data collection and analysis, decision to publish, or preparation of the manuscript.*
- **YES** - Specify the role(s) played.

\* typeset

### Competing Interests

Use the instructions below to enter a competing interest statement for this submission. On behalf of all authors, disclose any [competing interests](#) that could be perceived to bias this work—acknowledging all financial support and any other relevant financial or non-financial competing interests.

This statement **will appear in the published article** if the submission is accepted. Please make sure it is accurate. View published research articles from [PLOS NTDs](#) for specific examples.

The authors have declared that no competing interests exist.

**NO authors have competing interests**

Enter: *The authors have declared that no competing interests exist.*

**Authors with competing interests**

Enter competing interest details beginning with this statement:

*I have read the journal's policy and the authors of this manuscript have the following competing interests: [insert competing interests here]*

\* typeset

**Data Availability**

Yes - all data are fully available without restriction

Authors are required to make all data underlying the findings described fully available, without restriction, and from the time of publication. PLOS allows rare exceptions to address legal and ethical concerns. See the [PLOS Data Policy](#) and [FAQ](#) for detailed information.

A Data Availability Statement describing where the data can be found is required at submission. Your answers to this question constitute the Data Availability Statement and **will be published in the article**, if accepted.

**Important:** Stating 'data available on request from the author' is not sufficient. If your data are only available upon request, select 'No' for the first question and explain your exceptional situation in the text box.

Do the authors confirm that all data underlying the findings described in their manuscript are fully available without restriction?

**Describe where the data may be found in full sentences. If you are copying our sample text, replace any instances of XXX with the appropriate details.**

- If the data are **held or will be held in a public repository**, include URLs, accession numbers or DOIs. If this information will only be available after acceptance, indicate this by ticking the box below. For example: *All XXX files are available from the XXX database (accession number(s) XXX, XXX).*
- If the data are all contained **within the manuscript and/or Supporting Information files**, enter the following: *All relevant data are within the manuscript and its Supporting Information files.*
- If neither of these applies but you are able to provide **details of access elsewhere**, with or without limitations, please do so. For example:

*Data cannot be shared publicly because of [XXX]. Data are available from the XXX Institutional Data Access / Ethics Committee (contact via XXX) for researchers who meet the criteria for access to confidential data.*

*The data underlying the results presented in the study are available*

Raw sequences used in this study have been submitted to the Sequence Read Archive under the BioProject PRJNA491632, the transcriptome assembly have been submitted on the Figshare repository (<https://figshare.com/s/2f299e6f53c94f4a6168>) and they will be released upon publication.

|                                                                                                                                                                                                                                                                                   |                                                                                                                                                                                  |
|-----------------------------------------------------------------------------------------------------------------------------------------------------------------------------------------------------------------------------------------------------------------------------------|----------------------------------------------------------------------------------------------------------------------------------------------------------------------------------|
| <p><i>from (include the name of the third party and contact information or URL).</i></p> <ul style="list-style-type: none"><li>• This text is appropriate if the data are owned by a third party and authors do not have permission to share the data.</li></ul> <p>* typeset</p> |                                                                                                                                                                                  |
| Additional data availability information:                                                                                                                                                                                                                                         | Tick here if the URLs/accession numbers/DOIs will be available only after acceptance of the manuscript for publication so that we can ensure their inclusion before publication. |

1 **Pre-zygotic isolation mechanisms** between *Schistosoma haematobium* and  
2 *Schistosoma bovis* parasites: from mating interactions to differential gene  
3 expression

---

4  
5 Julien Kincaid-Smith<sup>1,2,§</sup>, Eglantine Mathieu-Bégné<sup>1§</sup>, Cristian Chaparro<sup>1</sup>, Marta Reguera-  
6 Gomez<sup>3</sup>, Stephen Mulero<sup>1</sup>, Jean-Francois Allienne<sup>1</sup>, Eve Toulza<sup>1</sup>, Jérôme Boissier<sup>1\*</sup>

7  
8 <sup>1</sup> IHPE, Univ. Montpellier, CNRS, Ifremer, Univ. Perpignan Via Domitia, Perpignan France.

9  
10 <sup>2</sup> Centre for Emerging, Endemic and Exotic Diseases (CEEED), Department of Pathobiology  
11 and Population Sciences (PPS), Royal Veterinary College, University of London, Hawkshead  
12 Campus, Herts, AL9 7TA, UK.

13  
14 <sup>3</sup> Departamento de Parasitología, Facultad de Farmacia, Universidad de Valencia, Av. Vicent  
15 Andrés Estellés s/n, 46100, Burjassot, Valencia, Spain.

16  
17 \* Corresponding author

18 §: Denotes co-first authors

19

20 **Short title: Pre-zygotic barriers between schistosome species**

21 *Author contributions:*

22 JB and ET conceptualized, supervised the study, and acquired the funding. JKS and SM carried  
23 out the experiments and conducted molecular analyses. CC, JFA curated the data. JKS, EMB,  
24 MRG performed bioinformatics and statistical analysis. JB, ET, JKS and EMB interpreted the  
25 data. JKS and EMB drafted and prepared the manuscript. JB, ET, JKS, EMB and CC revised  
26 the manuscript. All authors read and approved the final version of the manuscript.

27 *Availability of data and materials*

28 Raw sequences used in this study have been submitted to the Sequence Read Archive under the  
29 BioProject PRJNA491632, the transcriptome assembly have been submitted on the Figshare  
30 repository (<https://figshare.com/s/2f299e6f53c94f4a6168>) and they will be released upon  
31 publication.

32 *Funding*

33 This work has been funded by the French Research National Agency (project HySWARM,  
34 grant no. ANR-18-CE35-0001). SM was supported by the Occitania region (project MOLRISK,  
35 award no. NREST 2019/1/059), the European “Fonds Européen de Développement Régional”  
36 (FEDER) and MRG by the Fellowship of "Estancias breves" (linked to the Programa de Ayudas  
37 de Formacion de Profesorado Universitario 2015, Ministerio de Ciencia, Innovación y  
38 Universidades, Spain).

39 *Competing interest statement*

40 We have no competing interest.

41

42 **Abstract**

43 Species usually develop reproductive isolation mechanisms allowing them to avoid  
44 interbreeding. These preventive barriers can act before reproduction “pre-zygotic barriers”,  
45 limiting unfavourable mating, or during the life cycle, “post-zygotic barriers”, determining the  
46 viability and selective success of the hybrid offspring. Hybridization in parasites and the  
47 underlying reproductive isolation mechanisms allowing them to maintain their genetic integrity  
48 have poorly been explored and are still misunderstood. Using an integrated approach this work  
49 aims to quantify the relative importance of pre-zygotic barriers in *Schistosoma haematobium* x  
50 *Schistosoma bovis* crosses. These two co-endemic species cause schistosomiasis, one of the  
51 major debilitating parasitic diseases worldwide and can hybridize naturally. Using mate choice  
52 experiments we first tested if a specific mate recognition system exists between both species.  
53 Second, using RNA-sequencing we analysed differential gene expression between homo- and  
54 hetero-specific pairing in male and female adult parasites. We show that homo- and hetero-  
55 specific pairing occurs randomly between these two species, and few genes in both sexes are  
56 affected by hetero-specific pairing. This suggests that i) the choice of mate is not a reproductive  
57 isolating factor, and that ii) no pre-zygotic barrier except spatial isolation “by the host” seems  
58 to limit interbreeding between these two species. Interestingly, some of the genes affected by  
59 the pairing status of the worms can be related to pathways affected during male and female  
60 interactions and may also present interesting candidates for species isolating mechanisms and  
61 hybridization in schistosome parasites.

62

63 **Keywords:** Schistosoma, Hybridization, Reproductive isolation mechanisms, RNA-  
64 sequencing

65



66 **Author summary**

67 Understanding how species maintain their genetic integrity is a central question in evolutionary  
68 science. If isolation mechanisms are well documented in free-living organisms, it is currently  
69 not the case for parasite species. Yet, occurrence of parasite hybrids is a critical global health  
70 concern since these hybrids are expected to be more harmful than parental species. We  
71 addressed the question of reproductive isolation mechanisms in parasitic species by conducting  
72 an integrative experimental study (from mate choice to gene expression) on two schistosome  
73 species (*S. haematobium* and *S. bovis*) that parasite human and cattle respectively and for which  
74 hybrids have been responsible of recent outbreaks, including out of endemic areas. We showed  
75 that *S. haematobium* and *S. bovis* mate randomly rather than have preferred homo-specific mate  
76 choice, but also that they only express a few genes differentially when involved in a hetero-  
77 specific pair compared to a homo-specific pair. We consequently suggest that these two  
78 schistosome species lack strong isolation mechanism but the one imposed by host specificity.  
79 Our results raise the concern that in absence of post-zygotic barriers, hybridization between  
80 both species might be more common than previously thought in areas where the two species  
81 overlap and encounter.

82

83

## 84 Introduction

85 Usually species cannot interbreed. A subset of obstacles has evolved in the course of speciation  
86 in order to limit gene flow via hybridization and maintain species boundaries. These obstacles  
87 are traditionally classified as pre- and post-zygotic barriers (also known as pre- or post-mating  
88 barriers) and can be defined as any mechanisms preventing or reducing gene flow between  
89 groups of potentially interbreeding individuals [1]. Pre-zygotic barriers include spatial isolation  
90 (two species live in different habitats), behavioural isolation (individuals can choose to mate  
91 with individual of their own species), temporal isolation (copulation does not occur at the same  
92 time e.g., different seasons), mechanical isolation (sex organs are not compatible) and gametic  
93 isolation (the gametes encounters but fertilization does not occur). When the first barrier is  
94 crossed, post-zygotic isolation mechanisms can arise to prevent gene flow. Post-zygotic barriers  
95 include hybrid unviability (hybrids die prematurely), reduced fitness with low fertility (hybrids  
96 are poorly fertile or infertile) or hybrid breakdown (a longer process where the hybrids lines  
97 are counter-selected compared to their parental forms). The strength and/or the order of each  
98 barrier are variable among species making difficult to predict the evolution of reproductive  
99 isolation mechanisms [2]. Moreover, reproductive isolation is often the result of an  
100 accumulation and interaction of multiple pre- and post-zygotic mechanisms restricting most  
101 gene flow [3]. However, it is generally admitted that the pre-zygotic isolation barriers are  
102 enhanced in sympatric species [4] and are the most effective because they act early to prevent  
103 producing un-adapted progeny [5].

104 Despite their importance in term of biodiversity [6] and animal or human health, parasite  
105 species have received less attention than free living organisms both in terms of hybridization  
106 and understanding the role of pre- or post-zygotic mechanisms in their reproductive isolation  
107 [7]. The pre-zygotic barriers usually include additional and stronger obstacles to overcome  
108 compared to free living organisms. For instance, the "habitat barrier" includes both the

109 geographic area, the host species and tropism within the host. For parasites, hosts are inimical  
110 habitats imposing strong selective pressures (co-evolutionary arms race) requiring constant  
111 adaptation of parasites for the completion of their life cycle. The specialisation of parasite  
112 species to a particular host is thus a strong pre-zygotic isolation mechanism shaped through its  
113 hosts potentially preventing hybridization and favouring speciation. However, some related  
114 species manage to retain their genetic identity while parasitizing the same host, meaning that  
115 they have acquired selective mechanisms for reproductive isolation. Hybridization and pre-  
116 zygotic reproductive barriers have been studied on very few parasite models: plasmodium,  
117 cestodes and schistosomes [7–9]. Partial pre-zygotic barriers have been evidenced between  
118 *Plasmodium berghei* and *P. yoeli* [8]. It was not the case between *Schistocephalus solidus* and  
119 *S. pungitii* [7], suggesting in this last case that post-zygotic selection against hybrids is  
120 presumably the most important driving force limiting gene flow between these two parasite  
121 sister species [7].

122 Schistosomes are among the world greatest concerns in terms of human and animal health  
123 because they cause schistosomiasis debilitating diseases affecting over 230 million of people  
124 in the world [10]. There are currently six *Schistosoma* species infecting humans and 19 species  
125 infecting animals [9]. These parasites have a two-host life cycle, which includes a mammalian  
126 definitive host in which sexual reproduction occurs and a mollusc intermediate host in which  
127 asexual multiplication takes place. Schistosomes have the particularity of having separate sexes  
128 among other trematodes [11,12] and have therefore been intensively studied for their sexual  
129 features including male-female interactions [13,14], sex-ratio [15,16], mating system [17,18]  
130 and mating behaviour [19]. One direct consequence of dioecism in these species is the necessity  
131 of individuals of both sexes to infect the same definitive host. This constraint can lead to  
132 interaction of species infecting the same host, and in the case of porous reproductive pre-zygotic  
133 barriers to hybridization.

134 To conserve their genetic identity, schistosomes that inhabit the same definitive host are  
135 expected to present pre-zygotic isolating mechanisms. Among these barriers, habitat and  
136 behavioural isolation **have a great interest** in schistosome's sexual interactions. First habitat  
137 isolation is a three-level constraint that initially has to be overcome: the geographic area, same  
138 host and same localisation in the host. Indeed, schistosomes species are distributed worldwide  
139 (the majority in Africa), the vertebrate host specificity depends on the parasite species, and  
140 while the majority of species live in the mesenteric vein system, one species (*S. haematobium*)  
141 lives in the veins surrounding the bladder of humans. Second, behavioural isolation is more  
142 complex in schistosomes than in other species because mate choice is followed by a pairing-  
143 dependent differentiation of the female sexual organs [13,14]. Studies have clearly established  
144 that the presence of the male is necessary not only for the female sexual development but also  
145 for the maintenance of sexually mature **and active state and** does not depend upon species-  
146 specific pairing [20–22]. It was also demonstrated that female schistosomes stimulate the males  
147 through changes in **level** of glutathione and lipids, and stimulates tyrosine uptake in the male  
148 worms [13]. Hence, while males transfer glucose and lipid secretions to females, females also  
149 release factors affecting **male worms** physiology [23–26]. Thus, male and female schistosomes  
150 are strongly co-dependent, in terms of behaviour (*i.e.*, they have complementary roles in the  
151 hosts) but also physiologically [11] **and** an intimate and permanent association between sexes  
152 **is** necessary for reproduction to occur.

153 Nevertheless, several hybrid schistosomes have been evidenced and **like in several other clades**  
154 **the** isolation mechanisms increase with divergence time between taxa [4,9]. Hence, studies on  
155 **Schistosome** mating choices have revealed that depending on the parasite species some  
156 combinations readily pair (*S. haematobium* x *S. intercalatum* **and** *S. bovis* x *S. curassoni*), *S.*  
157 *mansoni* x *S. haematobium*), whereas others may be more selective and present mate choice  
158 systems (*S. mansoni* x *S. intercalatum*, *S. haematobium* x *S. mattheii*, and *S. mansoni* x *S.*

159 *margrebowiei* crosses [27–30]). In the former **case** and for many related species capable of  
160 hybridizing host specificity **hence** may be the sole barrier preventing interbreeding. This  
161 isolation mechanism “by the host” may be so efficient that species may lack any post-zygotic  
162 or other pre-zygotic mechanisms ultimately allowing them to hybridize when the opportunity  
163 arises. Therefore, the lack of reproductive incompatibility (*i.e.*, isolation by behaviour and  
164 physiology) between schistosome species infecting humans and animals may facilitate gene  
165 flow if the host isolating barriers are broken down.

166 *Schistosoma haematobium* x *S. bovis* hybrids are today the most studied hybrid system of  
167 schistosomes. These hybrids **have** first **been** identified in Niger by Brémont [31] and more  
168 recently in Senegal [32] but **seem** widely distributed in West Africa [31–36]. Moreover, this  
169 hybrid **cross** has recently been **responsible** for a large-scale outbreak in Europe (Corsica,  
170 France), where transmission of the disease is persistent [34,37]. ***Schistosoma haematobium* and**

**171 *S. bovis* are co-endemic in Africa, but their tropism is different (veins surrounding the bladder**  
**172 for *S. haematobium* vs. mesenteric veins *S. bovis*) and their definitive hosts are also different.**

173 *S. haematobium* is mainly a parasite of human  However, sporadic studies have shown that non-  
174 Human primates, *Cetartiodactyla* or rodents could be naturally **infected by this parasite species**  
175 [38–40]. Conversely, *S. bovis* is mainly a parasite of **ruminant** with sporadic cases of rodent  
176 **infection** [38]. Interestingly recent studies showed that *S. haematobium* x *S. bovis* hybrids  
177 **naturally infect rodent or cattle** [36,41]. Hybridization between these two species is particularly  
  
178 worrying because it raises the eventuality for a **human parasite to become zoonotic** but also  
179 because it may lead to changes in the parasites life history traits **including their response to**  
180 chemotherapeutic treatment [42]. Also these hybrids often display heterosis, in which their  
181 fitness outperforms parental species [9,32,33]. Importantly the existence of a mate recognition  
182 system between the two species would prevent natural occurrences of hybridization in

183 sympatric areas. **At the** contrary a lack of reproductive isolation could indicate that occurrences  
184 of hybridization **may be more frequent.**  
185 This study **hence proposes** an integrated approach, from mating behaviour to male and female  
186 gene expression, in order to quantify the relative importance of pre-zygotic barriers **in** *S.*  
187 *haematobium* x *S. bovis* **crosses.** First, using a mate choice experiment we tested whether  
188 specific mate recognition exists by quantifying the frequency of hetero-specific and homo-  
189 specific pairs compared to random mate choice expectations. Second, given the strong co-  
190 dependence between male and female schistosomes, we also analysed the influence of pairing  
191 (homo- vs hetero-specific) on the transcriptomic profile of male and female parasites using  
192 RNA **sequencing.** The molecular determinants of the very first step towards hybridization may  
193 give further insight into the permeability of the two species and reveal some important genes  
194 linked to male and female interaction, species isolation and hybridization. Relying on such an  
195 integrative approach from mate choice to gene expression hence allowed us to provide a better  
196 understanding of the mechanisms preventing and allowing hybridization between *S.*  
197 *haematobium* and *S. bovis*.

## 198 **Materiel and methods**

### 199 ***Ethics Statement***

200 Experiments were carried out according to national ethical standards established in the **writ** of  
201 February 1st, 2013 (NOR: AGRG1238753A), setting the conditions for approval, planning and  
202 operation of establishments, breeders and suppliers of animals used for scientific purposes and  
203 controls. The French Ministry of Agriculture and Fishery (Ministère de l'Agriculture et de la  
204 Pêche), and the French Ministry for Higher Education, Research and Technology (Ministère de  
205 l'Education Nationale de la Recherche et de la Technologie) approved the experiments carried

206 out for this study and provided permit A66040 for animal experimentation. The investigator  
207 possesses the official certificate for animal experimentation delivered by both ministries  
208 (Décret n° 87–848 du 19 octobre 1987; number of the authorization 007083).

### 209 *Parasite species and experimental infections*

210 The experimental design of this work was set for two objectives, i) assess the species mating  
211 choices by quantifying the frequency of hybridization, ii) force reciprocal hybridization and  
212 assess the transcriptomic changes occurring between homo-specific and hetero-specific paired  
213 males and females.

214 *Schistosoma haematobium* and *S. bovis* were maintained in the laboratory on *Bulinus truncatus*  
215 snails as intermediate hosts and *Mesocricetus auratus* as definitive hosts. The species strains  
216 used here originate from Cameroon and Spain for *S. haematobium* and *S. bovis*, respectively  
217 [63]. Experimental infections of hamsters with mixed combinations of both species in  
218 controlled proportions were performed after sexing procedure of the cercariae emitted by  
219 individually infected molluscs [63]. Briefly, *Bulinus truncatus* molluscs were individually  
220 exposed to one miracidium of *S. haematobium* or *S. bovis*. After a minimum of 55 days after  
221 exposing the molluscs to the parasites, successfully infected molluscs released either male or  
222 female clonal populations of cercariae of each species. After collecting cercariae from each  
223 individual mollusc, molecular sexing of the parasites where performed as described previously  
224 in Kincaid-Smith et al. (2016). These molluscs were then classified as releasing male or female  
225 cercariae of a specific species (*S. haematobium* or *S. bovis*) and were used for the subsequent  
226 experiments. A schematic view of the experimental infection procedure is presented in Fig 1.  
227 Depending on each objective, hamsters were subsequently infected with specific mixed  
228 combinations of cercariae by surface application method for one hour. Detailed methods  
229 employed for molluscs and rodents infections were described previously [64–66] and the

230 number and combinations of the *cercariae* used for each infestation is presented in Table 1.  
231 Specifically, in order to test species mate choices five hamsters were infected with mixed  
232 combinations of *cercariae* species and relied on the experiment 1 to 5 (*i.e.*, Exp. 1 to Exp. 5,  
233 see Table 1). Experiments 1 to 4 represent a limited choice of mate (Exp. 1 and Exp. 3 male  
234 choice - Exp. 2 and Exp. 4 female choice). In these experiments the excess of one sex ensures  
235 that all individuals of the other sex will be mated (Table 1). Experiment 5 represents species  
236 full choice of mate and is performed using the same number of *cercariae* of both sexes and both  
237 species (Table 1). According to our second objective, homo- and hetero-specific control  
238 experiments presented in Table 1 (*i.e.*, Homo control 1, Homo control 2, Hetero control 1 and  
239 Hetero control 2) are simultaneous infections without mate choice and are used to infer the  
240 transcriptomic profiles of homo- and hetero-specific paired worms (Table 1). Finally, for all  
241 infestations, three months after exposing hamsters to *cercariae*, the number of single and homo-  
242 specific versus hetero-specific paired worms was assessed after recovering worms by portal  
243 perfusion of the hamsters [66], separating couples and individualizing each partner in 96 well  
244 plates. Each worm and their status (paired, or single) as well as their sex (male or female) was  
245 thus carefully assigned.

246 **Fig 1. Schematic representation of experimental infection procedure.**

247



248 **Table 1: Experimental procedure to evaluate mate choice of *S. haematobium* and *S. bovis***  
 249 **parasites.** For each objective are listed the experiments conducted as well as the number of  
 250 males and females *S. haematobium* and *S. bovis* used and the number of biological replicates  
 251 (number of hamsters).

| Experiments                                                                                      | <i>S. haematobium</i> |         | <i>S. bovis</i> |         | Biological replicates |
|--------------------------------------------------------------------------------------------------|-----------------------|---------|-----------------|---------|-----------------------|
|                                                                                                  | Males                 | Females | Males           | Females |                       |
| <b>Objective 1:</b> Assess species mate choice and hybridisation frequency                       |                       |         |                 |         |                       |
| <b>Limited Choice</b>                                                                            |                       |         |                 |         |                       |
| Exp. 1 ( <i>S. haematobium</i> males' choice)                                                    | 150                   | 225     | -               | 225     | 5                     |
| Exp. 2 ( <i>S. haematobium</i> females' choice)                                                  | 225                   | 150     | 225             | -       | 5                     |
| Exp. 3 ( <i>S. bovis</i> males' choice)                                                          | -                     | 225     | 150             | 225     | 5                     |
| Exp. 4 ( <i>S. bovis</i> females' choice)                                                        | 225                   | -       | 225             | 150     | 5                     |
| <b>Full Choice</b>                                                                               |                       |         |                 |         |                       |
| Exp. 5                                                                                           | 150                   | 150     | 150             | 150     | 5                     |
| <b>Objective 2:</b> Assess the transcriptomic profiles of homo- and hetero-specific paired worms |                       |         |                 |         |                       |
| Homo-specific pairing control 1                                                                  | 300                   | 300     | -               | -       | 6                     |
| Homo-specific pairing control 2                                                                  | -                     | -       | 300             | 300     | 6                     |
| Hetero-specific pairing control 1                                                                | 300                   | -       | -               | 300     | 6                     |
| Hetero-specific pairing control 2                                                                | -                     | 300     | 300             | -       | 6                     |

252

### 253 *DNA extraction and species diagnostic multiplex PCR*

254 The worms collected were subjected to DNA extraction was performed as described previously  
 255 [67]. To identify the species of each worm we used a rapid diagnostic procedure based on  
 256 multiplex PCR reaction enabling the distinction between *S. haematobium* and *S. bovis* [68,69].  
 257 Briefly, the reaction is composed of a universal forward primer and two specific reverse primers  
 258 targeting either *S. haematobium* or *S. bovis* COI gene. In presence of *S. haematobium* DNA the  
 259 amplicon size is of 543 bp whereas in the presence of *S. bovis* DNA the amplicon size is of 306  
 260 bp allowing discriminating *S. haematobium* from *S. bovis* parasites (Table 2).

261 **Table 2: PCR primer sequences and amplicon size [68,69].**

| Target species primer                | Sequence (3'-5')         | Amplicon size |
|--------------------------------------|--------------------------|---------------|
| Universal forward primer             | TTTTTTGGTCATCCTGAGGTGTAT |               |
| <i>S. haematobium</i> reverse primer | TGATAATCAATGACCCTGCAATAA | 543bp         |
| <i>S. bovis</i> reverse primer       | CACAGGATCAGACAAACGAGTACC | 306 bp        |

262

263 The PCR reactions were carried out in a total volume of 12.5 µl containing GoTaq Flexi  
 264 Reaction Buffer (Promega), 1.5 mM of MgCl<sub>2</sub>, 0.4 µM of each of the 3 primers (at 10 µM  
 265 each), 0.2 µM of dNTP solution (at 10 µM each), 0.5 U of GoTaq G2 Hot Start Polymerase  
 266 (Promega, USA) and 1 µl of diluted DNA (1/10). The PCR program was: an initial denaturation  
 267 phase at 95°C for 3 min, followed by 35 cycles at 94°C for 30s, 58°C for 1.30s, 72°C for 1.30s,  
 268 and a final extension at 72°C for 7 min. PCR products were examined on 1.5% agarose gels at  
 269 120V for 45 min and using a 100 bp DNA-Ladder (Promega) for size estimation.

270

271 ***Statistical analysis***

272 After counting the number of homo-specific pairs, hetero-specific pairs and single worms of  
 273 each species, we calculated the expected number of single and mated pairs according to the null  
 274 hypothesis of random pairing (e.g., in the Exp. 1, the expected number of homo-specifically  
 275 paired *S. haematobium* males equals the total number of *S. haematobium* males times the total  
 276 number of *S. haematobium* females over the total number of females). Expected and observed  
 277 numbers of homo- and hetero-specific pairs were then compared using Chi-square tests.

278 ***RNA extraction and transcriptome sequencing of homo- and hetero-specific *S. haematobium****  
279 ***and *S. bovis* male and female pairs***

280 After portal perfusion of the hamsters containing the homo-specific and hetero-specific paired  
281 worms (homo-specific pairing control 1 and 2, and hetero-specific pairing control 1 and 2),  
282 paired adult worms were isolated to constitute separate triplicates of males and females homo-  
283 specifically paired, and triplicates of males and females hetero-specifically paired. Pools of 10-  
284 12 worms were gathered in 2ml microtubes and immediately frozen in liquid nitrogen before  
285 they were stored at -80°C. TRIzol™ RNA extraction and subsequent paired-end Illumina HiSeq  
286 4000 PE100 sequencing technology was performed on the samples. Briefly, pools of adult  
287 worms were subsequently grounded with two steel balls using Retsch MM400 cryobrush (2  
288 pulses at 300Hz for 15s). Total RNA was extracted using the TRIzol™ Thermo Fisher Scientific  
289 protocol (ref: 15596018) slightly modified as each reagent volumes were halved. Total RNA  
290 was eluted in 44 µl of ultrapure water before undergoing a DNase treatment using ThermoFisher  
291 Scientific Turbo DNA-free kit. RNA was then purified on a column using the Qiagen RNeasy  
292 mini kit and eluted in 42µl of ultrapure water. Quality and concentration were assessed by  
293 spectrophotometry with the Agilent 2100 Bioanalyzer system and using the Agilent RNA 6000  
294 nano kit. Further details are available at Environmental and Evolutionary Epigenetics Webpage  
295 (<http://methdb.univ-perp.fr/epievo/>).

296 ***Illumina libraries construction and high-throughput sequencing***

297 cDNA library construction and sequencing were performed at the Génome Québec platform.  
298 The TruSeq stranded mRNA library construction kit (Illumina Inc., USA) was used following  
299 the manufacturer's protocol on 300 ng of total RNA per sample. Sequencing of the 24 samples  
300 was performed in 2x100 bp paired-end on a Illumina HiSeq 4000. Sequencing data are available  
301 at the NCBI-SRA under the BioProject PRJNA491632.

302 ***Transcriptomic analysis of hetero-specific pairing vs. homo-specific pairing effect***

303 Raw sequencing reads were analysed on the Galaxy instance of the IHPE laboratory [70,71]  
304 implemented on the local server of our laboratory. First, raw reads were subjected to quality  
305 assessment and **sequencing** adaptor trimming. For this we used the set of tools based on  
306 FASTX-toolkit [72], as well as Cutadapt program (Galaxy Version 1.16.1) to remove adapter  
307 sequences from Fastq files [73]. **At last each sample reads were associated** into pairs using the  
308 FASTQ interlacer/de-interlace programs (Galaxy Version 1.1). Processed reads were mapped  
309 using RNA-star Galaxy Version 2.6.0b-1 [74] to the *S. haematobium* reference genome [43]  
310 downloaded from the Schistosoma Genomic Resources website SchistoDB  
311 ([http://schistodb.net/common/downloads/Current\\_Release/ShaematobiumEgypt/fasta/data/](http://schistodb.net/common/downloads/Current_Release/ShaematobiumEgypt/fasta/data/)).  
312 Exon-intron structure was thereafter reconstructed for each mapping BAM file using Cufflinks  
313 transcript assembly Galaxy Version 2.2.1.2, by setting the max intron length at 50000, but  
314 without any correction parameters [75]. Finally, in order to create a reference transcriptome  
315 representative of *S. haematobium* and *S. bovis* male and female reads, we merged all cufflinks  
316 data with Cuffmerge Galaxy Version 2.2.1.2 [75] without using any guide or reference. This  
317 enabled us to create a representative reference transcriptome of both species and both sexes  
318 using the same reference genome. The Genomic DNA intervals **of each newly assembled genes**  
319 **of this reference transcriptome was extracted from *S. haematobium*** reference genome and  
320 converted into a Fasta file.

321 The number of reads per transcripts for each sample (*i.e.*, the read abundance representative of  
322 each gene) was quantified using HTseq-count Galaxy Version 0.9.1 on the reference  
323 transcriptome, setting the overlap resolution mode on “union” [76]. Finally, we evaluated the  
324 differential gene expression levels between homo-specific and hetero-specific worms for each  
325 species and each sex separately using DESeq2 Version 1.28.1 [77] run on R version 4.0.0 [78].

326 We carried out four types of comparisons which respectively focused on *S. haematobium* males,  
327 *S. haematobium* females, *S. bovis* males and *S. bovis* females and contrasted genes expression  
328 profiles between hetero-specifically paired individuals and homo-specifically paired  
329 individuals. Differential gene expression results were filtered on the adjusted *P*-value  
330 (Benjamini-Hochberg multiple testing based False Discovery Rate (FDR)) and considered  
331 significant when  $\leq 5\%$ .

### 332 ***Functional annotation***

333 Using our BLAST local server, we annotated entirely the *de novo* assembled transcriptome by  
334 Blastx search against the non-redundant database of the NCBI. We conserved only the longest  
335 unique transcript (TCONS) of each representative gene (XLOC) for Blastx search and  
336 subsequent analysis. Output XML files were used for gene ontologies (GO) mapping and  
337 annotation using Blast2Go version 4.1.9 [44]. Finally, enrichment Fisher's exact tests were  
338 performed on up and down regulated set of genes focusing on biological process (BP) ontology  
339 terms. The *P*-value for significance was set to 5% False Discovery Rate (FDR).

340

## 341 **Results**

### 342 ***Mating choice experiments***

#### 343 ***Limited choice: Experiments 1 to 4:***

344 Details on the number of worms recovered from each hamster and whether they were paired or  
345 single in limited choice experiments are summarized in Table 3. Regardless of the sex and the  
346 species of the worms choosing to pair with either an homo-specific or an hetero-specific partner  
347 (*i.e.*, *S. haematobium* males, *S. haematobium* females, *S. bovis* males and *S. bovis* females, in  
348 Exp. 1, 2, 3 and 4 respectively, Table 3) both homo-specific and hetero-specific pairs were  
349 observed (Table 3, Exp. 1–4). Also, in each limited choice experiments (Exp. 1–4) we

350 consistently obtained an excess of both homo-specific and hetero-specific potential partners  
351 that remained single whereas all choosing partners (the one being the focus of each experiment)  
352 were paired (Table 3). This indicates that the choosing partner in each experiment was not  
353 limited in its choice by the number of homo- nor hetero-specific partner.  
354 Specifically, regarding *S. haematobium* males' choice (Table 3, Exp. 1) the number of homo-  
355 and hetero-specific pairs was significantly different from those expected under the random  
356 mating hypothesis ( $\chi^2=11.10$ ; d.f.=4; p-value= 0.049, Table 3). This was due in particular, to a  
357 bias toward hetero-specific pairs in only one hamster (hamster number 3, see Table 3).  
358 Regarding *S. haematobium* females' choice (Table 3, Exp. 2) at the contrary, the numbers of  
359 homo-specific pairs and hetero-specific pairs were not significantly different from expectations  
360 under the random mating hypothesis ( $\chi^2=3.118$ ; d.f.=4; p-value=0.682, Table 3). In the  
361 experiment 3 that focused on *S. bovis* males' choice, the number of paired worms recovered  
362 was extremely low, due to premature death of two hamsters and only two hamsters had enough  
363 worms to be analysed, although in this case statistics should be interpreted with caution (Table  
364 3, Exp. 3). Nevertheless, the numbers of homo-specific pairs and hetero-specific pairs were  
365 once again not significantly different from expectations under the random mating hypothesis  
366 ( $\chi^2=4.522$ ; d.f.=1; p-value=0.104, Table 3). Finally, regarding *S. bovis* females' choice (Table  
367 3, Exp. 4) similarly we did not find a significant difference between the numbers of observed  
368 and expected homo-specific pairs and hetero-specific pairs under random mating hypothesis  
369 ( $\chi^2=3.246$ ; d.f.=4; p-value=0.662, Table 3). Overall, when analysing all limited choice  
370 experiments together (*i.e.*, Exp. 1 to 4) no significant difference was recorded between the  
371 number of observed homo- and hetero-specific pairs and the number of homo- and hetero-  
372 specific pairs expected in a random mating scenario ( $\chi^2=21.71$ , d.f.=16, p-value=0.152, Table  
373 3).

374 **Table 3. Summarized information of experiments one to four (limited choice).** For each  
 375 experiment are displayed the sex and the species of the choosing partner, the number of  
 376 observed homo- and hetero-specific pairs and the number of (non-choosing) partners remained  
 377 single. Sh stands for *S. haematobium* and Sb stands for *S. bovis*. Expected number of pairs  
 378 regarding a random mating and initial partners frequencies are given into brackets. Chi-square  
 379 statistic, degree of freedom and p-value are given for each hamster, for each experiment and  
 380 for all experiment combined. \* indicates significant results.

| Exp.                  | Host | Choosing partner | Homo-sp. pairs | Hetero-sp. pairs | Homo-sp. singles | Hetero-sp. single | $\chi^2$ -statistic | d.f.      | P-value       |
|-----------------------|------|------------------|----------------|------------------|------------------|-------------------|---------------------|-----------|---------------|
| 1                     | 1    | ♂ Sh             | 11 (14)        | 14 (11)          | 20               | 9                 | 1.838               | 1         | 0.175         |
| 1                     | 2    | ♂ Sh             | 11 (15)        | 22 (18)          | 15               | 11                | 1.543               | 1         | 0.214         |
| 1                     | 3    | ♂ Sh             | 14 (20)        | 16 (10)          | 25               | 4                 | 5.057               | 1         | 0.025*        |
| 1                     | 4    | ♂ Sh             | 9 (9)          | 6 (6)            | 36               | 26                | 0.015               | 1         | 0.903         |
| 1                     | 5    | ♂ Sh             | 10 (13)        | 10 (7)           | 41               | 15                | 2.651               | 1         | 0.103         |
| <b>Total Exp. 1</b>   |      |                  |                |                  |                  |                   | <b>11.104</b>       | <b>4</b>  | <b>0.049*</b> |
| 2                     | 1    | ♀ Sh             | 10 (9)         | 2 (4)            | 7                | 5                 | 0.908               | 1         | 0.341         |
| 2                     | 2    | ♀ Sh             | 6 (5)          | 1 (2)            | 0                | 1                 | 0.429               | 1         | 0.513         |
| 2                     | 3    | ♀ Sh             | 12 (10)        | 3 (5)            | 11               | 10                | 1.688               | 1         | 0.194         |
| 2                     | 4    | ♀ Sh             | 16 (15)        | 3 (4)            | 6                | 2                 | 0.094               | 1         | 0.759         |
| 2                     | 5    | ♀ Sh             | 12 (12)        | 13 (13)          | 11               | 12                | <0.001              | 1         | 0.993         |
| <b>Total Exp. 2</b>   |      |                  |                |                  |                  |                   | <b>3.118</b>        | <b>4</b>  | <b>0.682</b>  |
| 3                     | 2    | ♂ Sb             | 4 (2)          | 0 (2)            | 46               | 55                | 4.400               | 1         | 0.036         |
| 3                     | 3    | ♂ Sb             | 2 (1)          | 1 (2)            | 22               | 32                | 0.742               | 1         | 0.389         |
| <b>Total Exp. 3</b>   |      |                  |                |                  |                  |                   | <b>4.522</b>        | <b>1</b>  | <b>0.104</b>  |
| 4                     | 1    | ♀ Sb             | 15 (12)        | 17 (20)          | 4                | 14                | 1.070               | 1         | 0.301         |
| 4                     | 2    | ♀ Sb             | 10 (8)         | 25 (28)          | 2                | 19                | 1.061               | 1         | 0.303         |
| 4                     | 3    | ♀ Sb             | 3 (3)          | 8 (8)            | 4                | 13                | 0.030               | 1         | 0.862         |
| 4                     | 4    | ♀ Sb             | 9 (8)          | 15 (16)          | 8                | 19                | 0.188               | 1         | 0.665         |
| 4                     | 5    | ♀ Sb             | 49 (49)        | 15 (15)          | 18               | 5                 | 0.007               | 1         | 0.932         |
| <b>Total Exp. 4</b>   |      |                  |                |                  |                  |                   | <b>3.246</b>        | <b>4</b>  | <b>0.662</b>  |
| <b>Total all Exp.</b> |      |                  |                |                  |                  |                   | <b>21.719</b>       | <b>16</b> | <b>0.152</b>  |

381

382 *Full choice: Experiment 5*

383 Details on the number of worms recovered from each hamster and whether they were paired or  
 384 single in **limited** full choice experiments are summarized in Table 4. When all partner choices  
 385 were allowed between **males and females** *S. haematobium* and *S. bovis*, four combinations of  
 386 pairing were obtained: two being homo-specific ( $\text{♂ Sh} \times \text{♀ Sh}$  and  $\text{♂ Sb} \times \text{♀ Sb}$ , Table 4) and  
 387 two being hetero-specific ( $\text{♂ Sh} \times \text{♀ Sb}$  and  $\text{♂ Sb} \times \text{♀ Sh}$ , Table 4). There was also an excess  
 388 of males and females of both species remaining single, suggesting that all possible choices were  
 389 not limited by partner availability (Table 4). Regarding the number of homo-specific and  
 390 hetero-specific pairs observed between *S. haematobium* and *S. bovis*, Chi-square tests did not  
 391 reveal significant departure from random mating hypothesis, when the number of each  
 392 **combination of pairing** was analysed in each hamster separately and also when analysing all  
 393 replicate together (Table 4).

394  
 395 **Table 4. Summarized information of experiment 5 (full choice).** For each combination (*i.e.*,  
 396 sex and species) are given the number of observed pairs and the number of single partners  
 397 remained single. Sh stands for *S. haematobium* and Sb stands for *S. bovis*. **Expected number of**  
 398 **pairs from a random mating and given the initial partners frequencies are indicated into**  
 399 **brackets.** Chi squared statistics, degree of freedom and p-value are given per hamster and for  
 400 the whole experiment.

| Host no.     | $\text{♂ Sh} \times \text{♀ Sh}$ | $\text{♂ Sb} \times \text{♀ Sb}$ | $\text{♂ Sh} \times \text{♀ Sb}$ | $\text{♂ Sb} \times \text{♀ Sh}$ | ♂ Sh | ♂ Sb | ♀ Sh | ♀ Sb | $\chi^2$ -statistic | d.f.      | p-value      |
|--------------|----------------------------------|----------------------------------|----------------------------------|----------------------------------|------|------|------|------|---------------------|-----------|--------------|
|              | 29                               |                                  |                                  |                                  |      |      |      |      |                     |           |              |
| 1            | 1 (2)                            | (24)                             | 5 (9)                            | 4 (5)                            | 8    | 5    | 4    | 9    | 3.358               | 3         | 0.340        |
| 2            | 8 (8)                            | 2 (1)                            | 5 (4)                            | 1 (2)                            | 8    | 3    | 23   | 8    | 1.786               | 3         | 0.618        |
| 3            | 7 (5)                            | 2 (2)                            | 1 (2)                            | 2 (3)                            | 6    | 5    | 19   | 11   | 2.307               | 3         | 0.511        |
| 4            | 4 (4)                            | 6 (3)                            | 3 (4)                            | 1 (3)                            | 10   | 4    | 13   | 11   | 4.806               | 3         | 0.187        |
| 5            | 5 (6)                            | 1 (1)                            | 6 (6)                            | 2 (1)                            | 20   | 3    | 17   | 16   | 0.796               | 3         | 0.850        |
| <b>Total</b> |                                  |                                  |                                  |                                  |      |      |      |      | <b>13.053</b>       | <b>12</b> | <b>0.365</b> |

401



402 ***Transcriptomic response in homo- vs. hetero-specific pairs***

403 *RNA sequencing, transcriptome assembly and gene annotation of the homo- and hetero-specific*  
404 *pairs*

405 Each **condition** (*i.e.*, **homo-specifically paired *S. haematobium*, hetero-specifically paired *S.***  
406 ***haematobium*, homo-specifically paired *S. bovis*, and hetero-specifically paired *S. bovis***)  
407 composed of three biological replicates were analysed separately for males and females (**24**  
408 **samples**). Between ~24.7 and ~42.3 million high quality Illumina HiSeq 4000 PE100 RNA-seq  
409 reads were obtained after sequencing of the 24 samples. After quality control and adaptor  
410 trimming, between ~19.2 and ~33,1 million reads were uniquely mapped **on** *S. haematobium*  
411 reference genome and **counted** for gene expression analysis [43]. Counted reads represented  
412 ~78% of raw reads, with 51% **providing** from *S. haematobium* and 48% providing from *S. bovis*  
413 (Supplementary Table S1).

414 The reference transcriptome assembly on which tests were carried out, was composed of 73,171  
415 putative isoform sequences identified as TCONS, and 18,648 unique genes identified as  
416 XLOCS. We conserved the longest isoform (TCONS) for each gene (XLOC) for subsequent  
417 annotation. The GTF and Fasta file of this transcriptome are available in a Figshare repository  
418 (<https://figshare.com/s/2f299e6f53c94f4a6168>). Blast annotations and Gene Ontology terms of  
419 the complete reference transcriptome are available in Supplementary File S1, Sheet 1. On the  
420 18,648 genes, 14,414 found at least one hit following Blastx analysis, and 12,332 of them were  
421 mapped to at least one GO term using Blast2GO [44].

422 ***Differential gene expression***

423 Quantification of read abundance as well as differential gene expression analysis were  
424 performed on the 18,648 genes for each homo- and hetero-specific condition (Supplementary  
425 File S1, Sheet 2 and 3-6, respectively). The heatmap of the sample-to-sample distances as well

426 as the principal component analysis plot are presented in Fig 2. A total of 1,277 genes (~7%)  
427 were differentially expressed in at least one of the four homo- vs. hetero-specific comparisons  
428 with a FDR <5% (Supplementary File S1, Sheet7). Of these, 1,234 (97%) had a match using  
429 Blastx against the non-redundant database of the NCBI and 1,088 (85%) were mapped and  
430 successfully annotated with at least one GO term using Blast2GO [44] (Supplementary File S1  
431 Sheet 7).

432 **Fig 2. Differentiation between the samples in term of gene expression profiles.** Principal  
433 component plot of the samples a) and Heatmap of the sample-to-sample distances b).

434 Most of the differentially expressed genes were identified in *S. haematobium* males, with 1,166  
435 genes differentially expressed between the hetero-specific and homo-specific pairing  
436 **conditions** (734 over-expressed and 432 under-expressed in hetero-specific paired males  
437 compared to homo-specific ones). Log2-Fold changes were quite low with only one of these  
438 1,166 DEG having a Log2-Fold Change higher than 1.5 and none had Log2-Fold change lower  
439 than -1.5 (Fig 3, Supplementary File S1 Sheet 7). In *S. haematobium* females 47 genes were  
440 differentially expressed between hetero- vs. homo-specific conditions (22 over-expressed and  
441 25 under-expressed in hetero-specific females). Among these 47 DEG, 6 had Log2-Fold  
442 changes higher than 1.5 and one had a Log2-Fold change lower than -1.5 (Fig 3, Supplementary  
443 File S1 Sheet 7). In *S. bovis* females, 88 genes were differentially expressed between hetero-  
444 vs. homo-specific conditions (58 over-expressed and 30 under-expressed in hetero-specific  
445 females). Among these 88 DEG, 48 had Log2-Fold changes higher than 1.5 and 11 had Log2-  
446 Fold changes lower than -1.5 (Fig 3, Supplementary File S1 Sheet 7). Finally, no **genes**  
447 differentially expressed **were** identified in *S. bovis* males. Significantly ( $p<5%$ ) over- and  
448 under-expressed genes (XLOC) for each comparison as well as their annotation are **synthesized**  
449 in Supplementary File S1, Sheet 7.

450 **Fig 3. Genes expression profile in hetero-specifically compared to homo-specifically**  
451 **paired worms.** Volcano plots showing the log transformed adjusted p-values (*i.e.*, FDR) and  
452 the log fold changes for the 18,648 unique genes of the reference transcriptome assembly for  
453 *S. haematobium* males a), *S. haematobium* females b), *S. bovis* females c) and *S. bovis* males  
454 d). Black dots refer to non-significant genes regarding their expression profile (over an FDR of  
455 5%). Red dots refer to differentially expressed genes at a FDR of 5%, green dots refer to  
456 differentially expressed genes at a FDR between 5% and 1% and blue dots refer to differentially  
457 expressed genes at a FDR between 1% and 1 %.

458 *Gene Ontology and enrichment analysis of the differentially expressed genes*

459 Gene ontology categories significantly enriched in either over- or under-expressed genes were  
460 found in *S. haematobium* males (Fig 4, Supplementary File S1, Sheet 8) whereas in *S.*  
461 *haematobium* females, *S. bovis* males and females (in which fewer differentially expressed  
462 genes were detected), no GO term were significantly enriched.

463 **Fig 4. Biological processes impacted by hetero-specific pairing in males *S. haematobium*.**

464 Barplot showing the biological processes significantly enriched in differentially expressed  
465 genes, either over-expressed or under-expressed in hetero-specific condition compared to  
466 homo-specific condition, in *S. haematobium* males.

467  
468 In *S. haematobium* males, **B**iological processes enriched in under-expressed genes (in hetero-  
469 specific paired males compared to homo-specific ones) were related to signal transduction,  
470 notably through neuronal processes (synaptic transmission, cholinergic, chemical synaptic  
471 transmission, postsynaptic, G protein-coupled receptor signaling pathway), development  
472 (anatomical structure development), metabolism (glycogen biosynthetic process, negative  
473 regulation of endopeptidase activity), transmembrane transport (potassium ion transmembrane  
474 transport), response to stimuli (response to drug, peptidyl-proline hydroxylation, cell redox  
475 homeostasis) and cell adhesion (homophilic cell adhesion via plasma membrane adhesion  
476 molecules) (Fig 4, Supplementary File S1, Sheet 8).

477 On the other hand, Biological processes enriched in over-expressed genes (in hetero-specific  
478 males) were related to signal transduction including again some neuronal processes (e.g.,  
479 transmembrane receptor protein tyrosine kinase signaling pathway, regulation of Ras protein  
480 signal transduction, regulation of axon extension), metabolism (e.g., proteolysis involved in  
481 cellular protein catabolic process, phosphatidylcholine metabolic process, long-chain fatty acid  
482 metabolic process, lipid droplet organization), response to stimuli (e.g., response to other  
483 organism, phagocytosis, cellular response to chemical stimulus), transmembrane transport (e.g.,  
484 anion transmembrane transport, vesicle fusion, regulation of vesicle-mediated transport,  
485 inorganic cation import across plasma membrane, exocytosis, positive regulation of Notch  
486 signaling pathway), localization (e.g., establishment of localization in cell), locomotion (e.g.,  
487 regulation of locomotion, microtubule-based process, actin filament organization) and also cell  
488 adhesion (e.g., cell junction assembly) (Fig 4, Supplementary File S1, Sheet 8).

489 No GO terms were found enriched neither in over- nor under-expressed genes in *S. bovis* and  
490 *haematobium* hetero- vs. homo-specifically paired females (Supplementary file S1, Sheet 7).

491 However, based on annotations, in *S. haematobium* females, we found differentially expressed  
492 genes that corresponded to genetic mobile elements (e.g., XLOC\_014282: integrase core  
493 domain, XLOC\_014741: TPA: endonuclease-reverse transcriptase, XLOC\_009783:  
494 endonuclease-reverse transcriptase), genes involved in transmembrane transport (e.g.,  
495 XLOC\_009318: phosphatase methylesterase 1 (S33 family) and XLOC\_010891: Calcium-  
496 binding mitochondrial carrier S -1), stress response including oxidation-reduction processes  
497 (e.g., XLOC\_017856: heat shock, XLOC\_012518: epidermal retinoid dehydrogenase 2 and  
498 XLOC\_018492: iron-dependent peroxidase) and other functions such as reproduction, or  
499 development (e.g., XLOC\_015776: egg CP391S, XLOC\_007823: Craniofacial development  
500 2). Similarly, in *S. bovis* females, we found differentially expressed genes that corresponded to  
501 genetic mobile elements as well (e.g., XLOC\_017328: R-directed D polymerase from

502 transposon X-element, XLOC\_018050: R-directed D polymerase from mobile element jockey-  
503 like or XLOC\_018156: gag-pol poly), genes involved ion transport (*e.g.*, XLOC\_008268: Bile  
504 salt export pump, XLOC\_003851: sodium-coupled neutral amino acid transporter 9 isoform X2  
505 and XLOC\_005754: Y+L amino acid transporter), response to stress (*e.g.*, XLOC\_017856: heat  
506 shock and XLOC\_009339: Universal stress) and as well other function such as reproduction,  
507 growth or metabolism (*e.g.*, XLOC\_014939: early growth response, XLOC\_015393:  
508 Syptotagmin-1, XLOC\_016728: egg CP391S-like and XLOC\_012591: Cathepsin B-like  
509 cysteine proteinase precursor). Hence, for *S. haematobium* and *S. bovis* females, differentially  
510 expressed genes were quite similar in **term** of function, regardless of their expression profile  
511 (under- or over-expression in hetero-specific pairs) and regardless of the schistosome species.

## 512 **Discussion**

513 In this study we aimed to investigate potential reproduction isolation mechanisms in two  
514 schistosome species causing major debilitating parasitic diseases **worldwide** and that show  
515 evidences for extensive hybridization in nature [34,45]. Specifically, we tested whether  
516 hybridization between *S. haematobium* and *S. bovis* could be constrained or promoted by mate  
517 choices and whether these mate choices are associated with specific transcriptomic profiles in  
518 hetero- and homo-specifically paired individuals. **We overall showed** that mate choice of *S.*  
519 *haematobium* and *S. bovis* occurred in a random fashion and seems to depend only on **partner**  
520 **relative abundances**. Also, we did not detect any major transcriptomic changes in hetero-  
521 specifically **paired males and females *S. haematobium* and *S. bovis* compared to homo-**  
522 **specifically paired individuals**. These results suggest that these two species lack **any other** pre-  
523 zygotic **barrier than** habitat isolation **by the host which would make them more prone to**  
524 **hybridize.**

525 In this work, first, we showed that the two frequently co-endemic species *S. haematobium* and  
526 *S. bovis* readily pair with no preferences for neither homo-specific nor hetero-specific  
527 associations in simultaneous infections. The only exception was found in *S. haematobium*  
528 male's choice that appeared to be biased toward hetero-specific pairing. This observation may  
529 reveal *S. haematobium* male's preference for the *S. bovis* females or a higher competence of *S.*  
530 *bovis* females, which may be better at pairing compared to *S. haematobium* females. Such  
531 results were for instance previously found for *S. haematobium* males when competing with *S.*  
532 *intercalatum* [27], *S. mattheii* [46] or *S. mansoni* [47]. However, since the bias toward hetero-  
533 specific pairing in the experiment Exp. 1 was mainly due to abundant hetero-specific pairs in  
534 only one hamster over the five used, this result should be considered with caution. Further  
535 caution is also required since the full choice experiment did not confirm such a bias toward  
536 hetero-specific pairing with *S. bovis* females. Consequently, our different mate choice  
537 experiments (limited and full choice) rather indicate no differences in competitiveness and that  
538 *S. haematobium* and *S. bovis* males and females tend to mate randomly, which suggest that  
539 there is no behavioural barriers preventing hetero-specific pairing once both species co-infect  
540 the same definitive host.

541 The second part of this study aimed to assess the transcriptomic profiles associated with hetero-  
542 specific and homo-specific pairings between *S. haematobium* and *S. bovis*. Since different  
543 species might constitute a different stimulus for the other partner, we expected at first to find a  
544 strong impact of the hetero-specific pairing, and especially on female transcriptomes compared  
545 to males since they respond to males' stimuli for their sexual maturation [21]. However, only  
546 few differentially expressed genes (*i.e.*, from zero for *S. bovis* mate choice to 1 166 for *S.*  
547 *haematobium* mate choice) were observed in both male and females. In particular, no  
548 differentially expressed genes were identified in *S. bovis* males depending on homo- vs. hetero-  
549 specific pairing, and biological processes enriched in differentially expressed genes were

550 identified only for *S. haematobium* male pairing. Also, most of differentially expressed genes  
551 identified presented low Log2-Fold changes (notably in *S. haematobium* males where only one  
552 DEG exceeded a Log2-Fold change of 1.5). Thus, the influence of hetero-specific pairing on  
553 male and female adult worms of both species in terms of number of differentially expressed  
554 genes, related biological processes and gene expression level was not striking. Such a result  
555 suggests that both species may be highly receptive to each other since no major transcriptomic  
556 adjustments are induced by hetero-specific pairings. This observation is hence consistent with  
557 our precedent mating experiments that suggest random pairing between both species and further  
558 show that there is no major physiological nor molecular barriers making hetero-specific  
559 pairings less prone to occur.

560 Although pairings between male and female *S. haematobium* and *S. bovis* did not result in many  
561 differentially expressed genes, males *S. haematobium* appeared to be the most affected by the  
562 pairing status. More differentially expressed genes identified in males, and in particular more  
563 over-expressed genes in males involved in hetero-specific pairs (i.e., 734 over-expressed  
564 whereas only 432 were under-expressed) was somehow puzzling. Generally, during mating  
565 more transcriptomic changes have been identified in females compared to males [14,48,49].  
566 Our result might thus be due to a lower variability in the transcriptomic profiles of the different  
567 biological replicates of *S. haematobium* males in comparison to others simply technically easing  
568 the identification of differentially expressed genes. Also, it is worth noting that although *S.*  
569 *haematobium* males had more genes differentially expressed, females had overall higher log2  
570 Fold Change for their differentially expressed genes. Alternatively, although non-exclusive,  
571 males could indeed display a more transcriptomic adjustments than females, for instance in  
572 order to properly initiate female maturation depending on their species. Nevertheless, since we  
573 did not identify any differentially expressed genes in *S. bovis* males, and also because the log2-  
574 Fold change of the DEG identified in *S. haematobium* males were low, it seems difficult to

575 conclude that one or the other sex is preferentially impacted during hetero-specific pairing, or  
576 that one species is more prone to initiate females species sexual maturation. Our results rather  
577 suggest that overall, only few transcriptomic adjustments are associated with hetero-specific  
578 pairing between *S. bovis* and *S. haematobium*.

579 Among these transcriptomic adjustments associated with the pairing status of the worms, it is  
580 worth noting that some genes and processes had functions that could be linked to male-female  
581 interactions notably linked to reproductive functions as suggested by other studies. Notably,  
582 among female schistosomes, we found three genes encoding egg proteins that were  
583 differentially expressed in *S. haematobium* and/or *S. bovis* females, and that are well-known  
584 female-associated gene products [50]. Similarly, a transcript matching the Syptotagmin-1 gene  
585 was under-expressed in hetero-specifically paired females *S. bovis*. Syptotagmin-1 is notably  
586 known to have a female-specific expression as well as to be regulated during pairing [48].  
587 Finally, we found two differentially expressed genes in **females *S. bovis* matching with**  
588 **cathepsin B and L**, two genes that encode digestive enzymes specifically expressed by females  
589 when **pairing** [50]. Similarly, in *S. haematobium* males, we found several genes and biological  
590 processes related to male-female interaction. Indeed the first insights into the molecular basis  
591 of male and female interaction with a particular interest in the pairing process, proliferation,  
592 differentiation and maturation of female gonads have underlined the major role of signal  
593 transduction cascades and particularly signalling pathways such as the TGF-beta and Ras (*e.g.*,  
594 receptor tyrosine kinase coupled pathway) signalling pathways [51–57]. Also, those pathways,  
595 notably the TGF-beta signaling pathway are known to induce the production of the  
596 gynecophoric canal protein by males during pairing which is a trigger for females maturation  
597 [52]. Interestingly, in this work, among genes whose expression was affected by homo- vs.  
598 hetero-specific pairing in *S. haematobium* males, we notably found the TGF-beta signal  
599 transducer gene but also two gynecophoral canal protein genes, **and** both transmembrane



600 receptor protein tyrosine kinase signaling pathway and regulation of Ras protein signal  
601 transduction processes were enriched in over-expressed genes in hetero-specific pairs. Also  
602 echoing more recent studies on the gonad specific and pairing-dependent transcriptomes of  
603 male schistosomes, we found several biological processes enriched either in over- or under-  
604 expressed genes in *S. haematobium* males that were involved in neuronal processes which have  
605 been shown to be associated with such male-female interaction patterns [14,49]. We  
606 consequently found that genes and processes impacted by homo- vs hetero-specific pairing in  
607 *S. haematobium* and *S. bovis* at least partly overlapped those generally affected during male-  
608 female regular homo-specific interactions. These results suggest that both species may have  
609 maintained similar patterns of interactions between males and females allowing them to  
610 reproduce. A moderate regulation of these genes during pairing with another species may thus  
611 allow quite easily the two parasite species to overcome their relatedness and divergence  
612 resulting in successful hetero-specific mating.

613 However, it is worth noting that among the differentially expressed genes identified, the  
614 majority of them was also related to processes that were not particularly documented to be  
615 impacted during male-female interactions (*e.g.*, genetic mobile elements, response to drug and  
616 stimuli, oxidation-reduction, cell-adhesion, metabolism). This hence suggests that genes  
617 impacted during homo- vs hetero-specific pairings in schistosomes also rely on processes that  
618 exceed male-female interaction and that notably seem related to stress response. These  
619 functions related to stimuli responses (that include oxidation-reduction processes as well as the  
620 genetic mobile elements we found, [58,59]), could indicate that at least at the molecular level  
621 schistosome species may respond to an hetero-specific signal as a stress although this does not  
622 seem to impede the success of such an hetero-specific mating. Alternatively, the pairing status  
623 (*i.e.*, homo-specific or hetero-specific) could impact worms' response to external stimuli  
624 including host stimuli. In particular hetero-specific *S. haematobium* males when compared to

625 homo-specific males, under-expressed a fair amount of genes involved in response to drugs  
626 (e.g., multidrug and toxin extrusion, Multidrug and toxin extrusion 2, Multidrug resistance or  
627 Multidrug resistance-associated), which may raise important questions regarding schistosome  
628 drug response in the context of co-infection and hybridization. More generally, many other  
629 genes potentially involved in the encounter, interaction, and communication of the two species  
630 genomes have arisen from this work. Further attention is thus needed to decipher the role of  
631 each of them in a hybridization and speciation context.  
632 More generally, our work opens new avenue regarding the understanding of the mechanisms  
633 allowing or preventing hybridization between schistosome species. Several recent studies have  
634 presented evidences of introgression between *S. haematobium* and *S. bovis* [36,37,60]. Our  
635 main finding of a lack of proper pre-zygotic barrier preserving the genetic integrity of *S.*  
636 *haematobium* and *S. bovis* is strongly in line with these recent observations. Actually, the two  
637 sister species *S. haematobium* and *S. bovis* have diverged relatively recently compared to other  
638 schistosomes, thus the genetic distance between both species is probably not sufficient to avoid  
639 successful interbreeding and both species genomes are presumably highly permeable to each  
640 other's alleles [61]. The karyotype of species is also important regarding the success of  
641 hybridization. Importantly *S. haematobium* and *S. bovis* have retained the same karyotype with  
642 n=8 chromosome pairs including sex chromosomes that are morphologically similar [62]. To  
643 produce viable offspring, both species could have thus retained similar processes allowing them  
644 to find their partner in the host, pair and reproduce. An important requirement for schistosomes  
645 to reproduce is their ability to locate each other in the hosts. In the case of hetero-specific  
646 pairing, the ability of the two partners to encounter and locate each other in the same host was  
647 originally thought to constitute the main mechanism allowing *S. haematobium* and *S. bovis* to  
648 keep their genetic integrity. Also, these two species live in different host compartments (i.e., *S.*  
649 *haematobium* lives in the urogenital vessels whereas *S. bovis* lives in the mesenteric vessels)

650 this tropism differences could as well contribute to make their encounter less likely within the  
651 same host. Although this barrier by the host might exist it nevertheless seems to be weak since  
652 hybrids can form easily in hamsters. Hence, the lack of any further pre-zygotic barrier implies  
653 that, in area where *S. haematobium* and *S. bovis* are co-occurring as well as their respective  
654 hosts, hybrids and introgressed individuals should be more likely to be found. So far  
655 introgression between *S. haematobium* and *S. bovis* is thought to be the result of an ancient  
656 event rather than an ongoing process [60]. However, since such hybrids may present heterosis  
657 and be more virulent compared to their parental species individuals, the understanding of the  
658 consequences of schistosome hybridization is a necessary next step to better anticipate the  
659 consequences in terms of disease dynamics and spread.

660

661 In conclusion, in this integrative study of *S. haematobium* and *S. bovis* behavioural and  
662 physiological isolation mechanisms we showed that natural hybridization between *S.*  
663 *haematobium* and *S. bovis* lack any strong pre-zygotic barrier but the one conditioned by their  
664 host specificity. Our data suggest that no mate recognition system mitigate hybridization  
665 between these two species and that no major transcriptomic adjustments are associated with  
666 hetero-specific pairings. This suggests that the two species remain sufficiently coadapted to  
667 each other to allow an efficient reproduction once in contact. This weak pre-zygotic barrier we  
668 exemplified may thus partly explain the high prevalence of such hybrids and echoes recent  
669 evidence of introgression between the two species. Because such hybrids may display an higher  
670 fitness compared to pure species, one could expect to find increased prevalence and intensities  
671 of schistosomiasis in areas where hybridization occurs which could run the risk of the spread  
672 of the disease in new environments. Ultimately, this could lead to new issues in the disease  
673 control, and alteration in the efficacy of current chemotherapeutic treatments.

674 **Acknowledgments**

675 This work was supported by the program HySWARM (ANR-18-CE35-0001) from the French  
676 Research National Agency and the Occitania region (MOLRISK). We would like to  
677 acknowledge Génome Québec and University McGill innovation center as well as Roscoff  
678 Bioinformatics platform ABiMS (<http://abims.sb-roscoff.fr>) and NGS facility at the bio-  
679 environment platform (University of Perpignan). This study is set within the framework of the  
680 “Laboratoires d’Excellence (LABEX)” TULIP (ANR-10-LABX-41).

681

682

683 **References**

- 684 1. Barton N, Bengtsson BO. The barrier to genetic exchange between hybridising  
685 populations. *Heredity*. 1986;57: 357–376. doi:10.1038/hdy.1986.135
- 686 2. Nosil P. *Ecological speciation*. Oxford University Press; 2012.
- 687 3. Barnard-Kubow KB, Galloway LF. Variation in reproductive isolation across a species  
688 range. *Ecol Evol*. 2017;7: 9347–9357. doi:10.1002/ece3.3400
- 689 4. Coyne JA, Orr HA. “Patterns of Speciation in *Drosophila*” Revisited. *Evolution*. 1997;51:  
690 295. doi:10.2307/2410984
- 691 5. Kirkpatrick M, Ravigné V. Speciation by Natural and Sexual Selection: Models and  
692 Experiments. *Am Nat*. 2002;159: S22-35. doi:10.1086/338370
- 693 6. Windsor DA. Controversies in parasitology, Most of the species on Earth are parasites.  
694 *Int J Parasitol*. 1998;28: 1939–1941. doi:https://doi.org/10.1016/S0020-7519(98)00153-2
- 695 7. Henrich T, Kalbe M. The role of prezygotic isolation mechanisms in the divergence of  
696 two parasite species. *BMC Evol Biol*. 2016;16: 1–10. doi:10.1186/s12862-016-0799-5
- 697 8. Ramiro RS, Khan SM, Franke-Fayard B, Janse CJ, Obbard DJ, Reece SE. Hybridization  
698 and pre-zygotic reproductive barriers in *Plasmodium*. *Proc R Soc B Biol Sci*. 2015;282.  
699 doi:10.1098/rspb.2014.3027
- 700 9. Léger E, Webster JP. Hybridizations within the Genus *Schistosoma*: implications for  
701 evolution, epidemiology and control. *Parasitology*. 2016; 1–16.  
702 doi:10.1017/S0031182016001190
- 703 10. Colley DG, Bustinduy AL, Secor WE, King CH. Human schistosomiasis. *Lancet Lond*  
704 *Engl*. 2014;383: 2253–2264. doi:10.1016/S0140-6736(13)61949-2
- 705 11. Loker ES, Brant S V. Diversification, dioecy and dimorphism in schistosomes. *Trends*  
706 *Parasitol*. 2006;22: 521–528. doi:10.1016/j.pt.2006.09.001
- 707 12. Basch PF. Why do schistosomes have separate sexes? *Parasitol Today*. 1990;6: 160–163.  
708 doi:10.1016/0169-4758(90)90339-6
- 709 13. Moné H, Boissier J. Sexual biology of schistosomes. *Adv Parasitol*. 2004;57: 89–189.  
710 doi:10.1016/S0065-308X(04)57002-1
- 711 14. Lu Z, Sessler F, Holroyd N, Hahnel S, Quack T, Berriman M, et al. Schistosome sex  
712 matters: A deep view into gonad-specific and pairing-dependent transcriptomes reveals a  
713 complex gender interplay. *Sci Rep*. 2016;6: 1–14. doi:10.1038/srep31150
- 714 15. BOISSIER J, MONÉ H. Experimental observations on the sex ratio of adult *Schistosoma*  
715 *mansoni*, with comments on the natural male bias. *Parasitology*. 2000;121: 379–383.
- 716 16. Beltran S, Boissier J. Male-biased sex ratio: why and what consequences for the genus  
717 *Schistosoma*? *Trends Parasitol*. 2010;26: 63–69. doi:10.1016/j.pt.2009.11.003

- 718 17. Beltran S, Boissier J. Schistosome monogamy: who, how, and why? *Trends Parasitol.*  
719 2008;24: 386–391. doi:10.1016/j.pt.2008.05.009
- 720 18. Beltran S, Boissier J. Are schistosomes socially and genetically monogamous? *Parasitol*  
721 *Res.* 2009;104: 481–483. doi:10.1007/s00436-008-1225-8
- 722 19. Beltran S, Cézilly F, Boissier J. Genetic dissimilarity between mates, but not male  
723 heterozygosity, influences divorce in schistosomes. *PLoS ONE.* 2008;3.  
724 doi:10.1371/journal.pone.0003328
- 725 20. Popiel I. Male-stimulated female maturation in *Schistosoma*: A review. *J Chem Ecol.*  
726 1986;12: 1745–1754. doi:10.1007/BF01022380
- 727 21. Popiel I, Cioli D, Erasmus DA. The morphology and reproductive status of female  
728 *Schistosoma mansoni* following separation from male worms. *Int J Parasitol.* 1984;14:  
729 183–190. doi:https://doi.org/10.1016/0020-7519(84)90047-X
- 730 22. Clough ER. Morphology and reproductive organs and oogenesis in bisexual and unisexual  
731 transplants of mature *Schistosoma mansoni* females. *J Parasitol.* 1981;67: 535–539.
- 732 23. Cornford EM, Fitzpatrick AM. The mechanism and rate of glucose transfer from male to  
733 female schistosomes. *Mol Biochem Parasitol.* 1985;17: 131–141.  
734 doi:https://doi.org/10.1016/0166-6851(85)90012-X
- 735 24. Loverde PT, Chen L. Schistosome female reproductive development. *Parasitol Today Pers*  
736 *Ed.* 1991;7: 303–8. doi:10.1016/0169-4758(91)90263-N
- 737 25. LoVerde PT, Niles EG, Osman A, Wu W. *Schistosoma mansoni* male–female interactions.  
738 *Can J Zool.* 2004;82: 357–374. doi:10.1139/z03-217
- 739 26. Kunz W. Schistosome male-female interaction: induction of germ-cell differentiation.  
740 *Trends Parasitol.* 2001;17: 227–231. doi:10.1016/S1471-4922(01)01893-1
- 741 27. Southgate VR, Tchuente LAT, Vercruysse J, Jourdane J. Mating behaviour in mixed  
742 infections of *Schistosoma haematobium* and *S. mattheei*. *Parasitol Res.* 1995;81: 651–656.
- 743 28. Tchuente LAT, Imbert-Establet D, Delay B, Jourdane J. Choice of mate, a reproductive  
744 isolating mechanism between *Schistosoma intercalatum* and *S. mansoni* in mixed  
745 infections. *Int J Parasitol.* 1993;23: 179–185. doi:10.1016/0020-7519(93)90139-P
- 746 29. Cosgrove CL, Southgate VR. Mating interactions between *Schistosoma mansoni* and *S.*  
747 *margrebowiei*. *Parasitology.* 2002;125: 233–243.
- 748 30. Webster BL, Southgate VR, Tchuente L-A. Mating interactions between  
749 *Schistosoma haematobium* and *S. mansoni*. *J Helminthol.* 2007/02/01. 1999;73: 351–356.  
750 doi:DOI: 10.1017/S0022149X99000591
- 751 31. Brémond P, Sellin B, Sellin E, Naméoua B, Labbo R, Théron A, et al. Arguments for the  
752 modification of the genome (introgression) of the human parasite *Schistosoma*  
753 *haematobium* by genes from *S. bovis*, in Niger. *C R Acad Sci III.* 1993;316: 667–670.

- 754 32. Huyse T, Webster BL, Geldof S, Stothard JR, Diaw OT, Polman K, et al. Bidirectional  
755 introgressive hybridization between a cattle and human schistosome species. PLoS  
756 Pathog. 2009;5. doi:10.1371/journal.ppat.1000571
- 757 33. Webster BL, Diaw OT, Seye MM, Webster JP, Rollinson D. Introgressive Hybridization  
758 of *Schistosoma haematobium* Group Species in Senegal: Species Barrier Break Down  
759 between Ruminant and Human Schistosomes. PLoS Negl Trop Dis. 2013;7.  
760 doi:10.1371/journal.pntd.0002110
- 761 34. Moné H, Holtfreter MC, Allienne JF, Mintsá-Nguéma R, Ibikounlé M, Boissier J, et al.  
762 Introgressive hybridizations of *Schistosoma haematobium* by *Schistosoma bovis* at the  
763 origin of the first case report of schistosomiasis in Corsica (France, Europe). Parasitol Res.  
764 2015;114: 4127–4133. doi:10.1007/s00436-015-4643-4
- 765 35. Angora EK, Allienne J-F, Rey O, Menan H, Touré AO, Coulibaly JT, et al. High  
766 prevalence of *Schistosoma haematobium* × *Schistosoma bovis* hybrids in schoolchildren  
767 in Côte d’Ivoire. Parasitology. 2020;147: 287–294. doi:10.1017/S0031182019001549
- 768 36. Savassi BAES, Mouahid G, Lasica C, Mahaman S-DK, Garcia A, Courtin D, et al. Cattle  
769 as natural host for *Schistosoma haematobium* (Bilharz, 1852) Weinland, 1858 x  
770 *Schistosoma bovis* (Sonsino, 1876) interactions, with new cercarial emergence and genetic  
771 patterns. Parasitol Res. 2020; 2189–2205. doi:10.1007/s00436-020-06709-0
- 772 37. Oey H, Zakrzewski M, Gravermann K, Young ND, Korhonen PK, Gobert GN, et al.  
773 Whole-genome sequence of the bovine blood fluke *Schistosoma bovis* supports  
774 interspecific hybridization with *S. haematobium*. Platt RN, editor. PLOS Pathog. 2019;15:  
775 e1007513. doi:10.1371/journal.ppat.1007513
- 776 38. Pitchford RJ. A check list of definitive hosts exhibiting evidence of the genus *schistosoma*  
777 (Weinland, 1858) acquired naturally in Africa and the Middle East. J Helminthol. 1977;51:  
778 229–251. doi:10.1017/S0022149X00007574
- 779 39. Rollinson D. The genus *Schistosoma*: a taxonomic appraisal. Biol Schistosomes Genes  
780 Latrines. 1987.
- 781 40. Pitchford RJ, Visser PS. The role of naturally infected wild rodents in the epidemiology  
782 of schistosomiasis in the Eastern Transvaal. Trans R Soc Trop Med Hyg. 1962;56: 126–  
783 135. doi:10.1016/0035-9203(62)90139-6
- 784 41. Catalano S, Sène M, Diouf ND, Fall CB, Borlase A, Léger E, et al. Rodents as Natural  
785 Hosts of Zoonotic *Schistosoma* Species and Hybrids: An Epidemiological and  
786 Evolutionary Perspective From West Africa. J Infect Dis. 2018; jiy029.  
787 doi:10.1093/infdis/jiy029
- 788 42. Webster JP, Gower CM, Knowles SCL, Molyneux DH, Fenton A. One health - an  
789 ecological and evolutionary framework for tackling Neglected Zoonotic Diseases. Evol  
790 Appl. 2016;9: 313–333. doi:10.1111/eva.12341
- 791 43. Young ND, Jex AR, Li B, Liu S, Yang L, Xiong Z, et al. Whole-genome sequence of  
792 *Schistosoma haematobium*. Nat Genet. 2012;44: 221–225. doi:10.1038/ng.1065

- 793 44. Conesa A, Götz S, García-Gómez JM, Terol J, Talón M, Robles M. Blast2GO: a universal  
794 tool for annotation, visualization and analysis in functional genomics research.  
795 *Bioinformatics*. 2005;21: 3674–3676.
- 796 45. Leger E, Webster JP. Hybridizations within the Genus *Schistosoma*: implications for  
797 evolution, epidemiology and control. *Parasitology*. 2017;144: 65–80.  
798 doi:10.1017/S0031182016001190
- 799 46. Webster BL, Southgate VR. Mating interactions of *Schistosoma haematobium* and *S.*  
800 *intercalatum* with their hybrid offspring. *Parasitology*. 2003;126: 327–338.
- 801 47. Webster BL, Southgate VR, Tchuente LAT. Mating interactions between *Schistosoma*  
802 *haematobium* and *S. mansoni*. *J Helminthol*. 1999;73: 351–356.
- 803 48. Grevelding CG, Sommer G, Kunz W. Female-specific gene expression in *Schistosoma*  
804 *mansoni* is regulated by pairing. *Parasitology*. 1997;115: 635–640.  
805 doi:10.1017/S0031182097001728
- 806 49. Leutner S, Oliveira KC, Rotter B, Beckmann S, Buro C, Hahnel S, et al. Combinatory  
807 Microarray and SuperSAGE Analyses Identify Pairing-Dependently Transcribed Genes  
808 in *Schistosoma mansoni* Males, Including Follistatin. Jones MK, editor. *PLoS Negl Trop*  
809 *Dis*. 2013;7: e2532. doi:10.1371/journal.pntd.0002532
- 810 50. Hoffmann KF. An historical and genomic view of schistosome conjugal biology with  
811 emphasis on sex-specific gene expression. *Parasitology*. 2004;128: S11–S22.  
812 doi:10.1017/S0031182004006213
- 813 51. LoVerde PT, Andrade LF, Oliveira G. Signal transduction regulates schistosome  
814 reproductive biology. *Curr Opin Microbiol*. 2009;12: 422–428.  
815 doi:10.1016/j.mib.2009.06.005
- 816 52. Osman A, Niles EG, Verjovski-Almeida S, LoVerde PT. *Schistosoma mansoni* TGF- $\beta$   
817 receptor II: Role in host ligand-induced regulation of a schistosome target gene. *PLoS*  
818 *Pathog*. 2006;2: 0536–0550. doi:10.1371/journal.ppat.0020054
- 819 53. LoVerde PT, Osman A, Hinck A. *Schistosoma mansoni*: TGF- $\beta$  signaling pathways. *Exp*  
820 *Parasitol*. 2007;117: 304–317. doi:10.1016/j.exppara.2007.06.002
- 821 54. Knobloch J, Beckmann S, Burmeister C, Quack T, Grevelding CG. Tyrosine kinase and  
822 cooperative TGF $\beta$  signaling in the reproductive organs of *Schistosoma mansoni*. *Exp*  
823 *Parasitol*. 2007;117: 318–336. doi:10.1016/j.exppara.2007.04.006
- 824 55. Beckmann S, Quack T, Burmeister C, Buro C, Long T, Dissous C, et al. *Schistosoma*  
825 *mansoni*: Signal transduction processes during the development of the reproductive  
826 organs. *Parasitology*. 2010;137: 497–520. doi:10.1017/S0031182010000053
- 827 56. Freitas TC, Jung E, Pearce EJ. TGF- $\beta$  signaling controls embryo development in the  
828 parasitic flatworm *Schistosoma mansoni*. *PLoS Pathog*. 2007;3: 489–497.  
829 doi:10.1371/journal.ppat.0030052



- 830 57. Andrade LF de, Mourão M de M, Geraldo JA, Coelho FS, Silva LL, Neves RH, et al.  
831 Regulation of *Schistosoma mansoni* Development and Reproduction by the Mitogen-  
832 Activated Protein Kinase Signaling Pathway. PLoS Negl Trop Dis. 2014;8: e2949.  
833 doi:10.1371/journal.pntd.0002949
- 834 58. Storz G, Imlay JA. Oxidative stress. Curr Opin Microbiol. 1999;2: 188–194.
- 835 59. Capy P, Gasperi G, Biémont C, Bazin C. Stress and transposable elements: co-evolution  
836 or useful parasites? Heredity. 2000;85: 101–106. doi:10.1046/j.1365-2540.2000.00751.x
- 837 60. Platt RN, McDew-White M, Le Clec'h W, Chevalier FD, Allan F, Emery AM, et al.  
838 Ancient Hybridization and Adaptive Introgression of an Invadysin Gene in Schistosome  
839 Parasites. Shapiro B, editor. Mol Biol Evol. 2019;36: 2127–2142.  
840 doi:10.1093/molbev/msz154
- 841 61. Kincaid-Smith J, Tracey A, de Carvalho Augusto R, Bulla I, Holroyd N, Rognon A, et al.  
842 Whole genome sequencing and morphological analysis of the human-infecting  
843 schistosome emerging in Europe reveals a complex admixture between *Schistosoma*  
844 *haematobium* and *Schistosoma bovis* parasites. bioRxiv. 2018. doi:10.1101/387969
- 845 62. Grossman a I, Short RB, Cain GD. Karyotype evolution and sex chromosome  
846 differentiation in Schistosomes (Trematoda, Schistosomatidae). Chromosoma. 1981;84:  
847 413–30. doi:10.1007/BF00286030
- 848 63. Kincaid-Smith J, Boissier J, Allienne JF, Oleaga A, Djuikwo-Teukeng F, Toulza E. A  
849 Genome Wide Comparison to Identify Markers to Differentiate the Sex of Larval Stages  
850 of *Schistosoma haematobium*, *Schistosoma bovis* and their Respective Hybrids. PLoS  
851 Negl Trop Dis. 2016;10: e0005138. doi:10.1371/journal.pntd.0005138
- 852 64. Boissier J, Rivera ER, Moné H. Altered behavior of the snail *Biomphalaria glabrata* as a  
853 result of infection with *Schistosoma mansoni*. J Parasitol. 2003;89: 429–433.  
854 doi:10.1645/0022-3395(2003)089[0429:ABOTSB]2.0.CO;2
- 855 65. Boissier J, Chlichlia K, Digon Y, Ruppel A, Moné H. Preliminary study on sex-related  
856 inflammatory reactions in mice infected with *Schistosoma mansoni*. Parasitol Res.  
857 2003;91: 144–150. doi:10.1007/s00436-003-0943-1
- 858 66. Théron a, Pages JR, Rognon a. *Schistosoma mansoni*: distribution patterns of miracidia  
859 among *Biomphalaria glabrata* snail as related to host susceptibility and sporocyst  
860 regulatory processes. Exp Parasitol. 1997;85: 1–9. doi:10.1006/expr.1996.4106
- 861 67. Beltran S, Galinier R, Allienne JF, Boissier J. Cheap, rapid and efficient DNA extraction  
862 method to perform multilocus microsatellite genotyping on all *Schistosoma mansoni*  
863 stages. Mem Inst Oswaldo Cruz. 2008;103: 501–503. doi:S0074-02762008000500017  
864 [pii]
- 865 68. Van den Broeck F, Geldof S, Polman K, Volckaert FAM, Huyse T. Optimal sample  
866 storage and extraction protocols for reliable multilocus genotyping of the human parasite  
867 *Schistosoma mansoni*. Infect Genet Evol. 2011;11: 1413–1418.  
868 doi:10.1016/j.meegid.2011.05.006

- 869 69. Webster BL, Rollinson D, Stothard JR, Huyse T. Rapid diagnostic multiplex PCR (RD-  
870 PCR) to discriminate *Schistosoma haematobium* and *S. bovis*. J Helminthol. 2010;84:  
871 107–114. doi:10.1017/S0022149X09990447
- 872 70. Giardine B, Riemer C, Hardison RC, Burhans R, Elnitski L, Shah P, et al. Galaxy: A  
873 platform for interactive large-scale genome analysis. Genome Res. 2005;15: 1451–1455.  
874 doi:10.1101/gr.4086505
- 875 71. Goecks J, Nekrutenko A, Taylor J, Afgan E, Ananda G, Baker D, et al. Galaxy: a  
876 comprehensive approach for supporting accessible, reproducible, and transparent  
877 computational research in the life sciences. Genome Biol. 2010;11. doi:10.1186/gb-2010-  
878 11-8-r86
- 879 72. Blankenberg D, Gordon A, Von Kuster G, Coraor N, Taylor J, Nekrutenko A, et al.  
880 Manipulation of FASTQ data with galaxy. Bioinformatics. 2010;26: 1783–1785.  
881 doi:10.1093/bioinformatics/btq281
- 882 73. Martin M. Cutadapt removes adapter sequences from high-throughput sequencing reads.  
883 EMBnet.journal. 2011;17: 10. doi:10.14806/ej.17.1.200
- 884 74. Dobin A, Davis CA, Schlesinger F, Drenkow J, Zaleski C, Jha S, et al. STAR: Ultrafast  
885 universal RNA-seq aligner. Bioinformatics. 2013;29: 15–21.  
886 doi:10.1093/bioinformatics/bts635
- 887 75. Trapnell C, Williams BA, Pertea G, Mortazavi A, Kwan G, van Baren MJ, et al. Transcript  
888 assembly and quantification by RNA-Seq reveals unannotated transcripts and isoform  
889 switching during cell differentiation. Nat Biotechnol. 2010;28: 511.
- 890 76. Anders S, Pyl PT, Huber W. HTSeq-A Python framework to work with high-throughput  
891 sequencing data. Bioinformatics. 2015;31: 166–169. doi:10.1093/bioinformatics/btu638
- 892 77. Love MI, Anders S, Huber W. Differential analysis of count data - the DESeq2 package.  
893 Genome Biology. 2014. doi:110.1186/s13059-014-0550-8
- 894 78. R Core Team. R: A language and environment for statistical computing. R Foundation  
895 for Statistical Computing, Vienna, Austria; 2020. Available: URL [https://www.R-](https://www.R-project.org/)  
896 [project.org/](https://www.R-project.org/)

897

Figure 1

*S. haematobium*

*S. bovis*

1) Monomiracidial exposition of molluscs

55 days

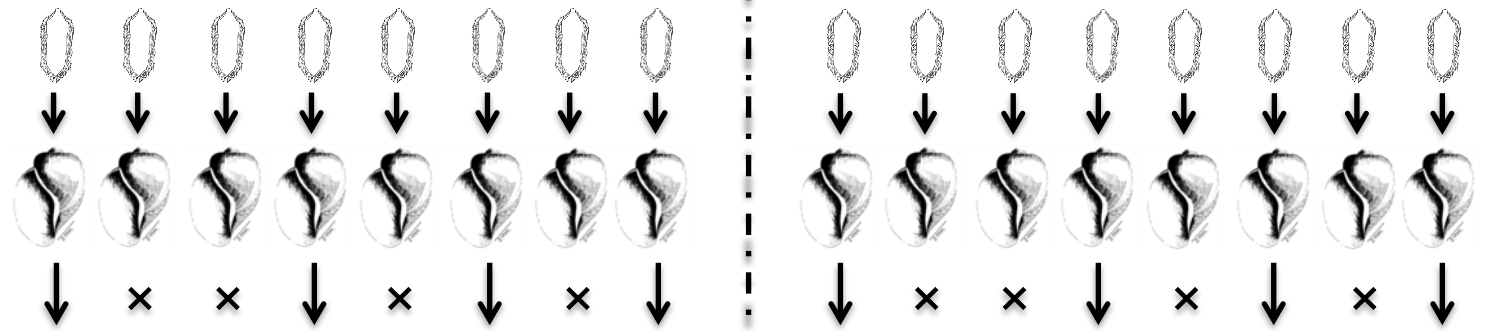

2) Molecular sexing of cercariae from infected molluscs

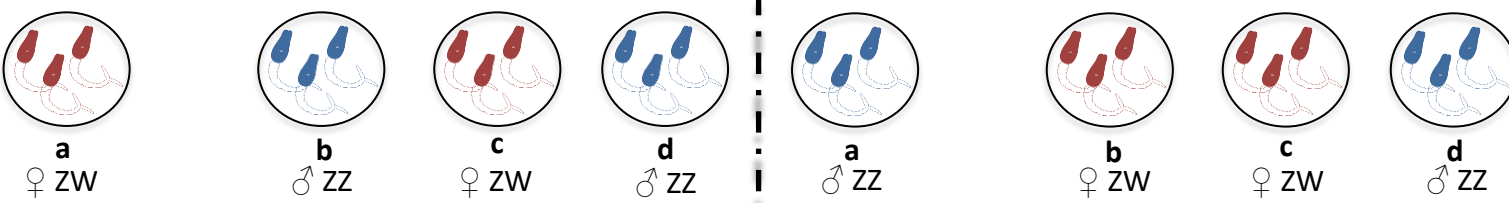

4) Isolating molluscs based on the sex of cercariae

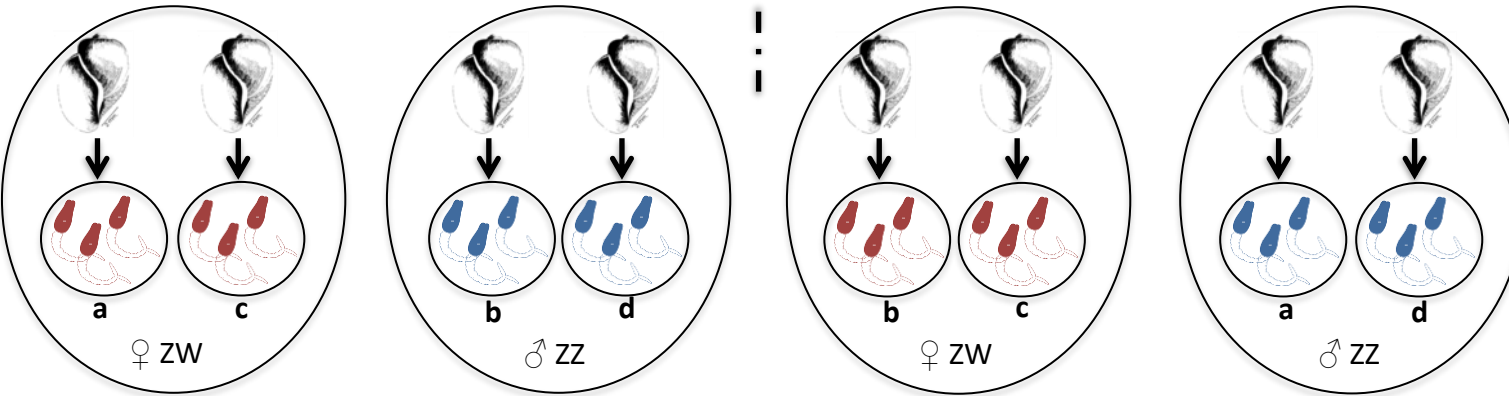

Example of homo-specific couples

*S. haematobium* ♂ x ♀

*S. bovis* ♂ x ♀

5) Use controlled sex cercariae for experimental infections

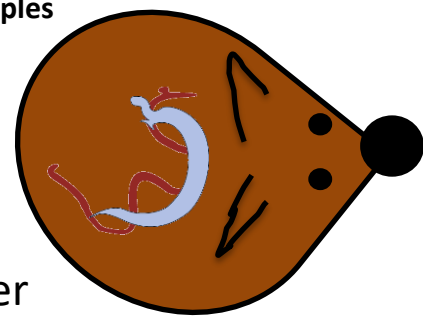

Hamster

Example of hetero-specific couples

♂ *S. haematobium* x ♀ *S. bovis*

♀ *S. haematobium* x ♂ *S. bovis*

Figure 2

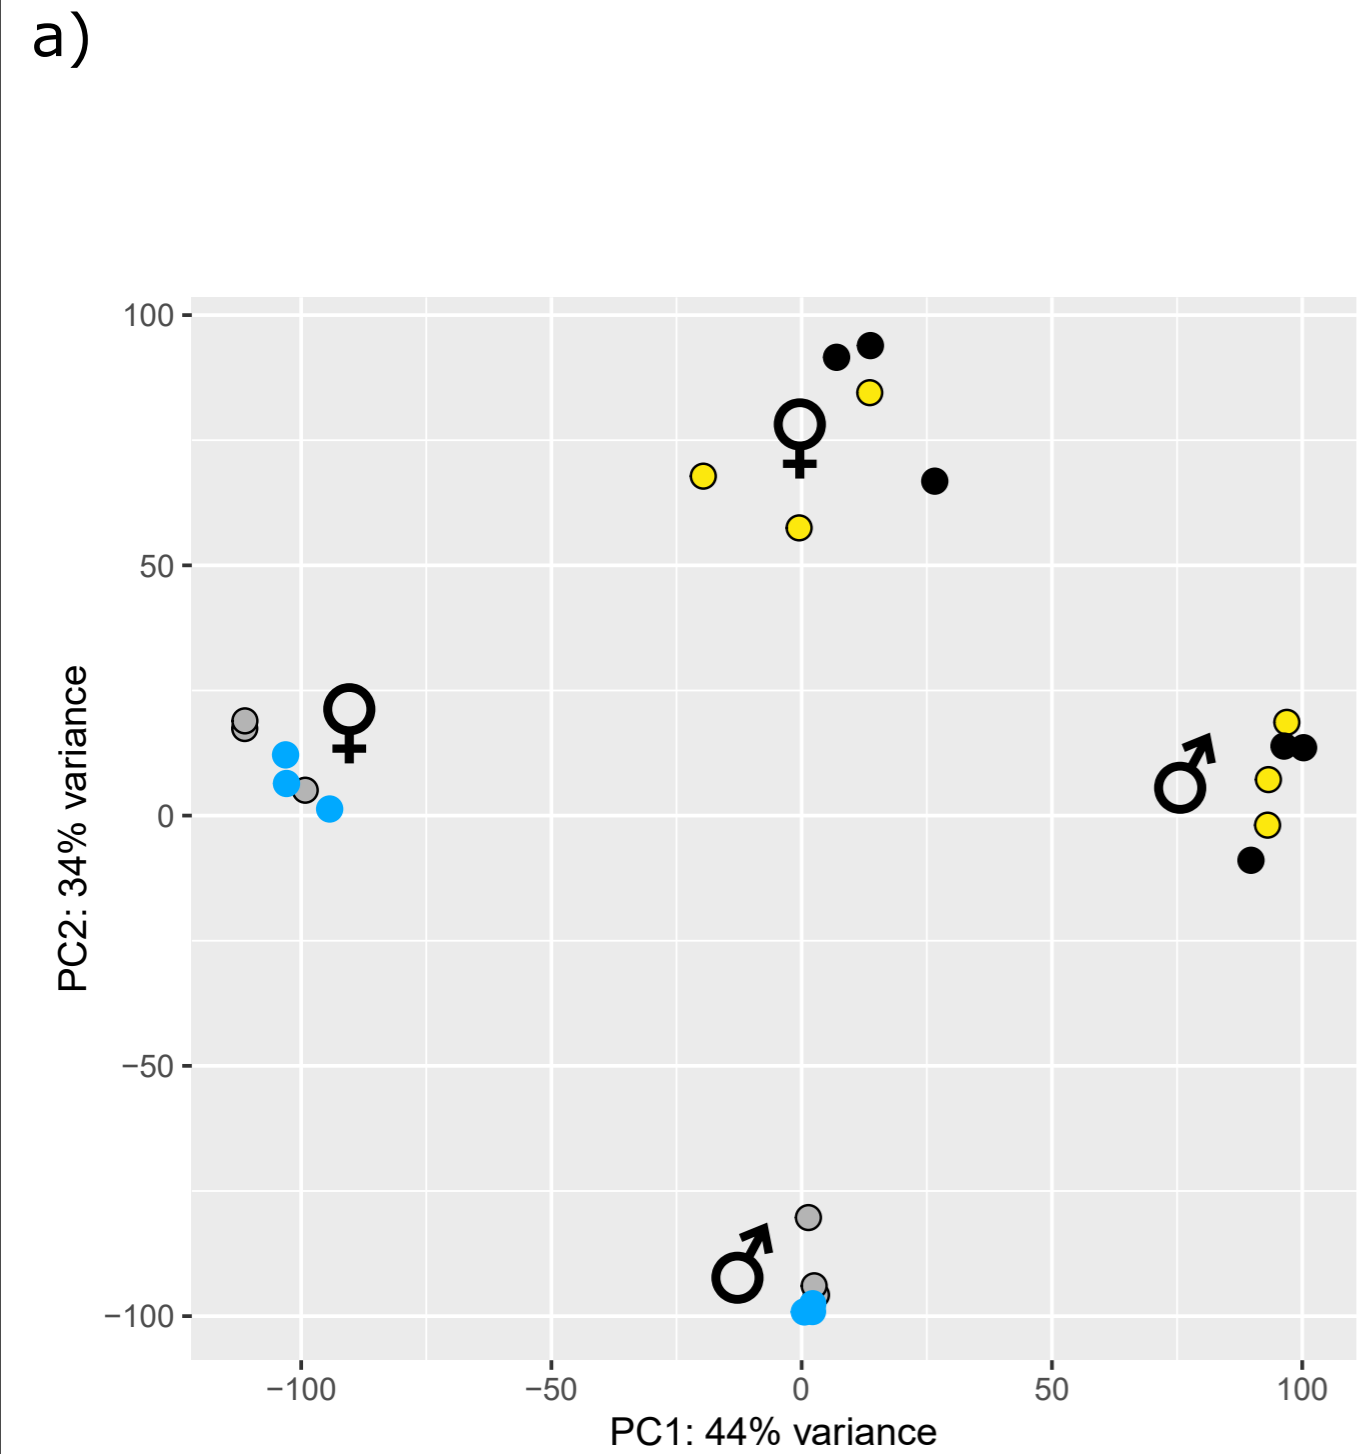

- *S. bovis* (heterospecific)
- *S. bovis* (homospecific)
- *S. haematobium* (heterospecific)
- *S. haematobium* (homospecific)

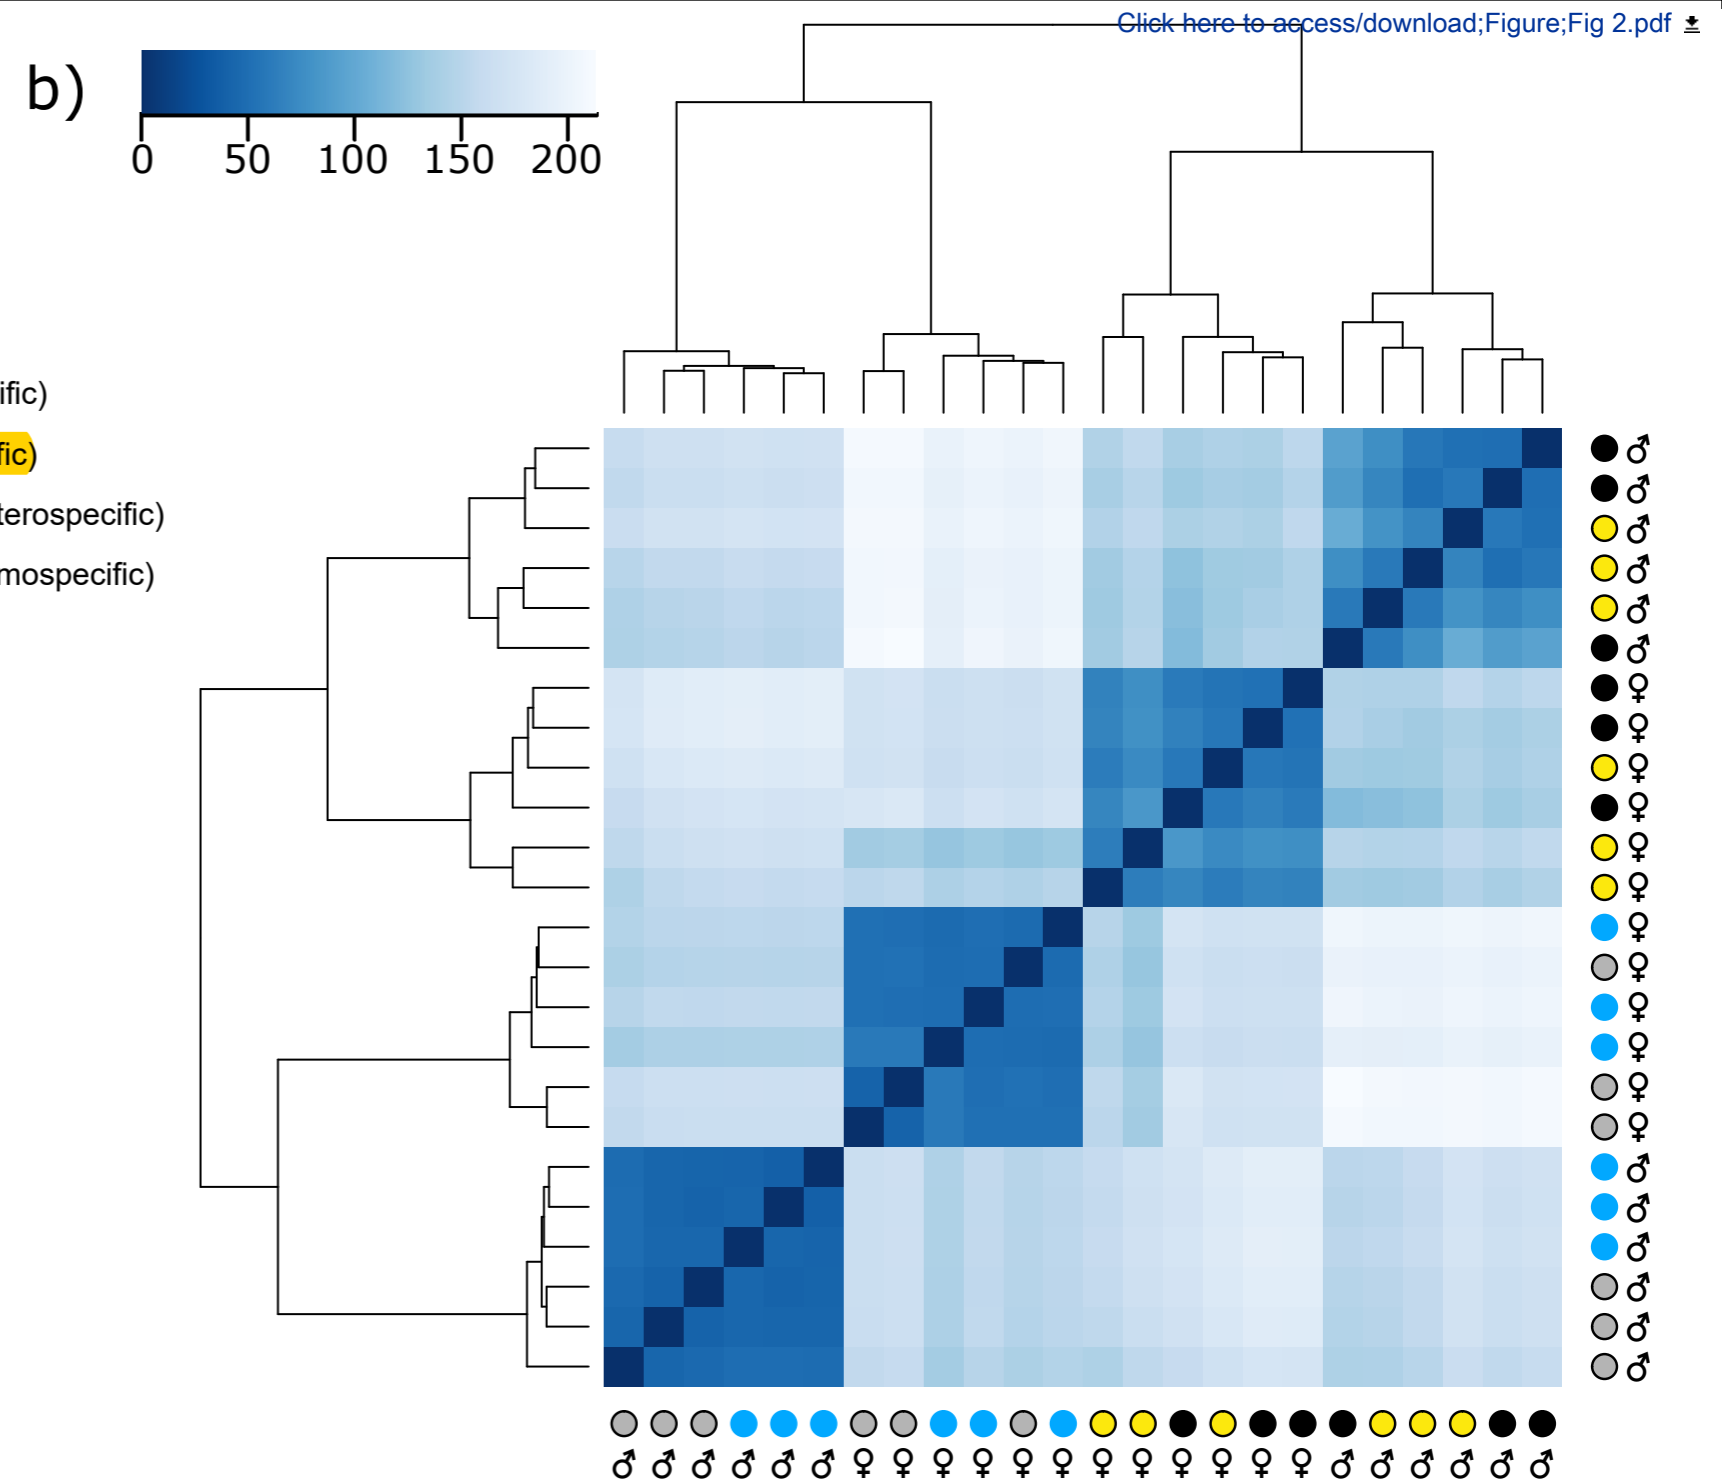

Figure 3

[Click here to access/download;Figure;Fig 3.pdf](#)

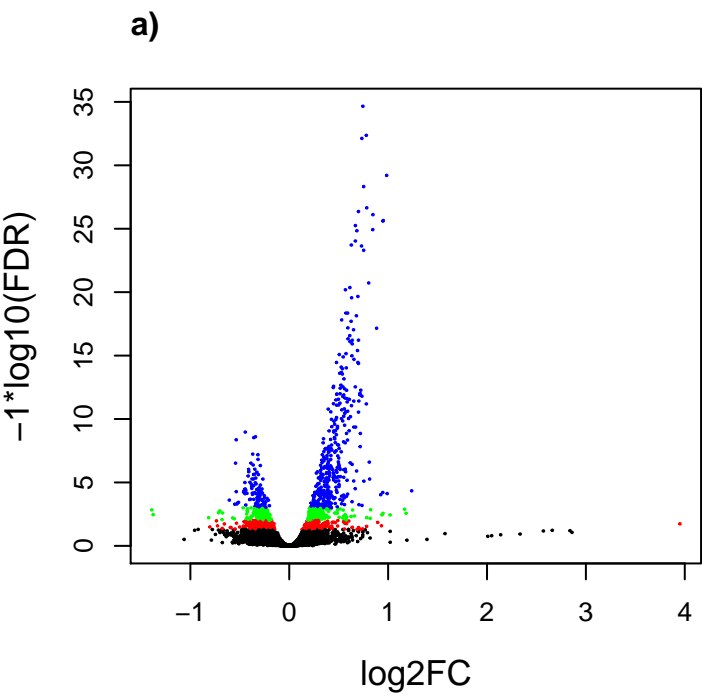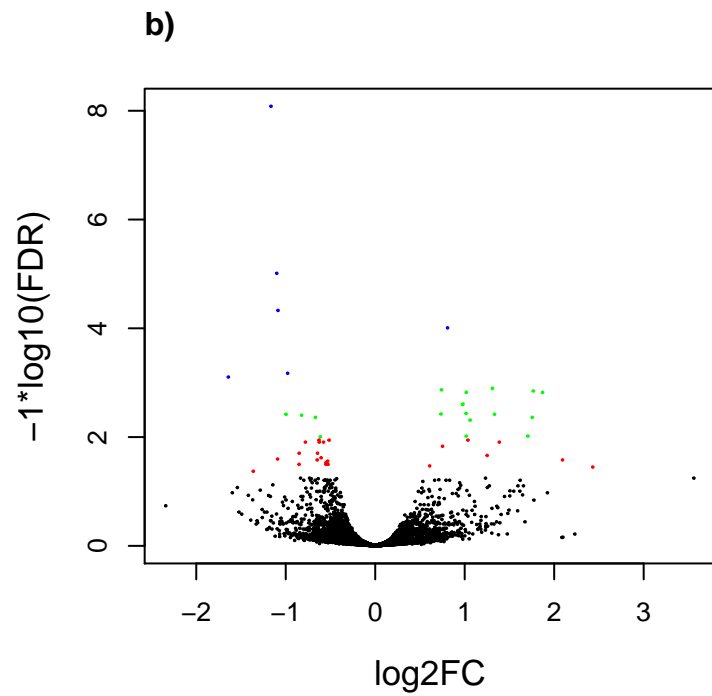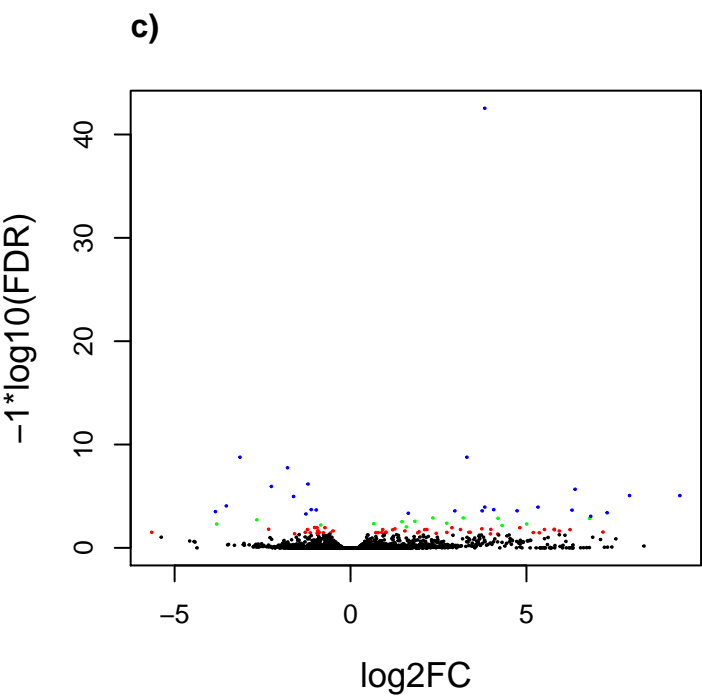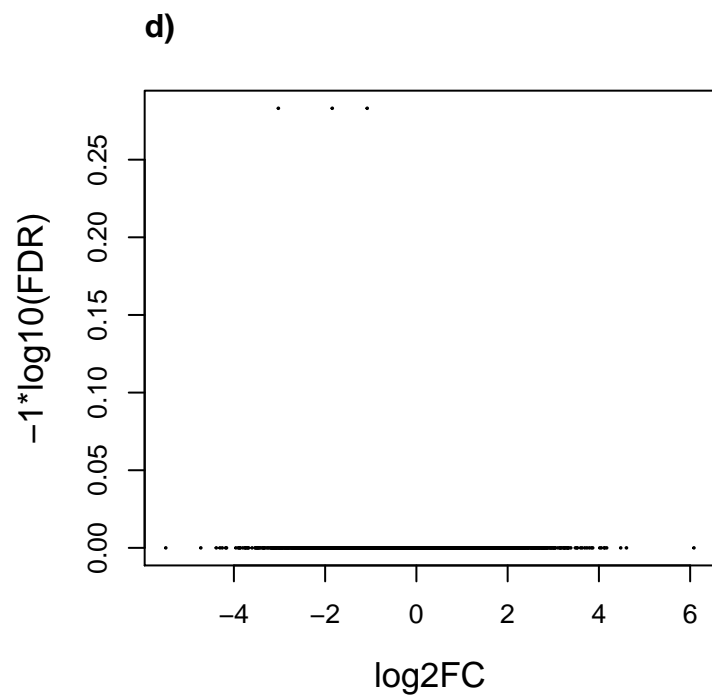

Figure 4

[Click here to access/download;Figure;Fig 4.pdf](#)

GO names

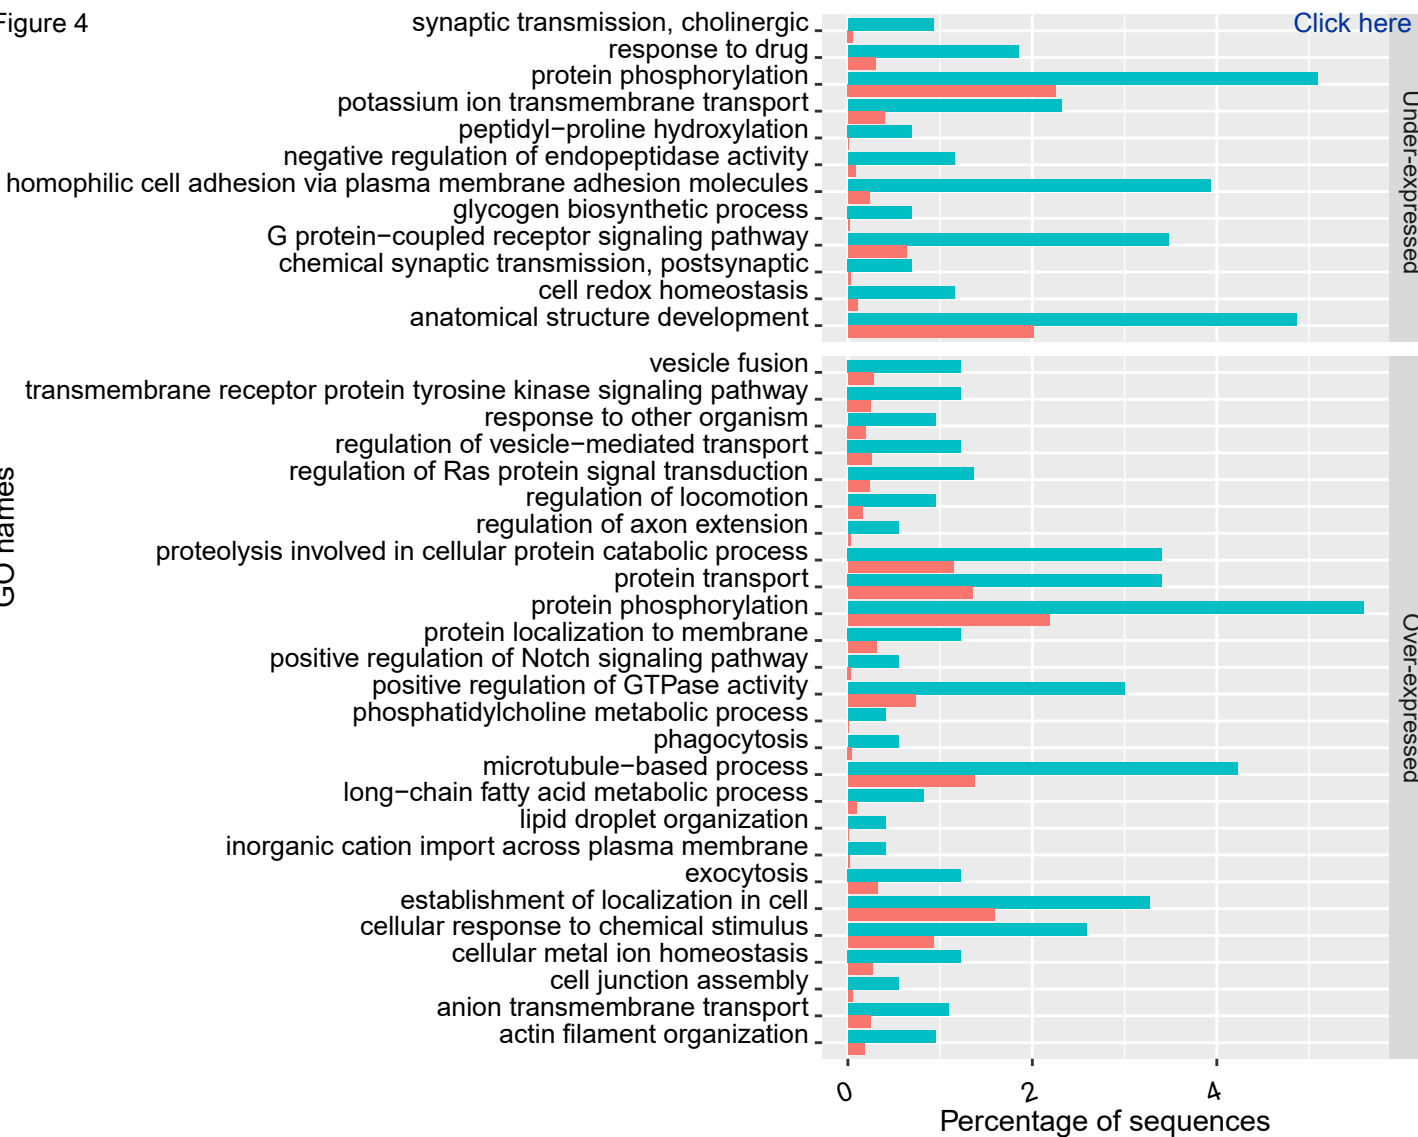

Gene set

All genes

differentially expressed genes

Percentage of sequences

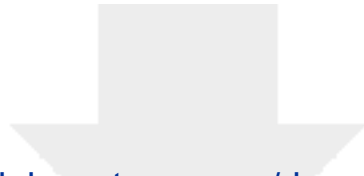

Click here to access/download  
**Supporting Information**  
Supplementary Table S1.docx

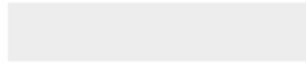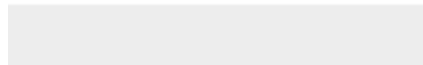



Click here to access/download  
**Supporting Information**  
Supplementary File S1.xlsx



Supplement: pntd.0009363.s003.pdf [file pntd.0009363.s003.pdf]
